# Supplementary material for: Biological conversion of cyclic ketones from catalytic fast pyrolysis with Pseudomonas putida KT2440
Source: Royal Society of Chemistry journal article supplement (doi:10.1039/d3gc00084b), 2023-01-01
Supplement: d3gc00084b1.xlsx [file d3gc00084b1.xlsx]

## Sheet: README
Supplementary data
Biological conversion of cyclic ketones from catalytic fast pyrolysis with Pseudomonas putida KT2440
a Renewable Resources and Enabling Sciences Center, National Renewable Energy Laboratory, Golden, CO, 80401, USA
This file contains:
Tab Dist_Fraction_Comp. The list of chemicals identified in each fraction following each of the three bio-oil distillations and their respective chemical class designation
Tab Figure_2. Growth and metabolite concentration data from Figure 2.
Tab Figure_3. Growth and metabolite concentration data from Figure 3.
Tab Figure_4. Growth and metabolite concentration data from Figure 4.
Tab Figure_5. Growth and metabolite concentration data from Figure 4.
Tab Figure_6. Growth and concentration data from Figure 5.
Tab S.Figure_1. Growth data from S.Figure 1
Tab S.Figure_2. Growth data metabolite concentration data from S.Figure 2
Tab S.Figure_3. Metabolite concentration data from S.Figure 3

## Sheet: Dist_Fraction_Comp
distillation number	fraction number	retention time (min)	peak area	class designation	carbons	molecular weight	RF	mols	mass (g)	sample mass (g)	fraction wt%
1	1	3.5857	12991830	C2-C4 acids	2	60.052	3.20571e+11	2.02636e-05	0.00121687	0.0232	0.0524512
1	1	3.8576	3297738	ketones	3	74.0785	3.20571e+11	3.42903e-06	0.000254017	0.0232	0.010949
1	1	4.8243	618915	ketones	5	84.118	3.20571e+11	3.86133e-07	3.24807e-05	0.0232	0.00140003
1	1	5.646	6162369	cyclopentanone	5	84.1164	3.20571e+11	3.84462e-06	0.000323396	0.0232	0.0139395
1	1	6.0327	122801	other	5	96.0841	3.20571e+11	7.6614e-08	7.36138e-06	0.0232	0.000317301
1	1	6.3348	755279	2-cyclopenten-1-one	5	82.1005	3.20571e+11	4.71209e-07	3.86865e-05	0.0232	0.00166752
1	1	6.4073	4979337	2-cyclopenten-1-one	5	82.1005	3.20571e+11	3.10654e-06	0.000255049	0.0232	0.0109935
1	1	6.4677	87183	2-methylcyclopentanone	6	98.143	3.20571e+11	4.5327e-08	4.44852e-06	0.0232	0.000191747
1	1	6.5282	503802	2-methylcyclopentanone	6	98.143	3.20571e+11	2.6193e-07	2.57066e-05	0.0232	0.00110804
1	1	6.6369	267598	3-methylcyclopentanone	6	98.143	3.20571e+11	1.39126e-07	1.36542e-05	0.0232	0.000588544
1	1	7.5915	66672	ketones	6	98.143	3.20571e+11	3.46632e-08	3.40195e-06	0.0232	0.000146636
1	1	7.7305	289358	other	7	130.185	3.20571e+11	1.28948e-07	1.6787e-05	0.0232	0.000723579
1	1	7.797	313588	other	7	130.185	3.20571e+11	1.39745e-07	1.81927e-05	0.0232	0.000784169
1	1	7.8453	874614	2-methyl-2-cyclopenten-1-one	6	96.1271	3.20571e+11	4.54717e-07	4.37106e-05	0.0232	0.00188408
1	1	7.9662	268695	other	6	110.111	3.20571e+11	1.39696e-07	1.5382e-05	0.0232	0.000663018
1	1	8.661	272014	ketones	7	112.17	3.20571e+11	1.21219e-07	1.3597e-05	0.0232	0.000586079
1	1	9.0477	217272	other	6	142.176	3.20571e+11	1.12961e-07	1.60603e-05	0.0232	0.000692254
1	1	9.1323	230659	other	6	142.176	3.20571e+11	1.19921e-07	1.70498e-05	0.0232	0.000734907
1	1	9.2833	390791	other	6	110.111	3.20571e+11	2.03175e-07	2.23717e-05	0.0232	0.000964297
1	1	10.1171	166306	ketones	7	110.154	3.20571e+11	7.41115e-08	8.16366e-06	0.0232	0.000351882
1	2	3.9664	69574331	C2-C4 acids	2	60.052	3.20571e+11	0.000108516	0.00651662	0.0206	0.316341
1	2	4.051	5155590	ketones	3	74.0785	3.20571e+11	5.36084e-06	0.000397123	0.0206	0.0192778
1	2	4.915	12155827	ketones	5	84.118	3.20571e+11	7.58386e-06	0.000637939	0.0206	0.0309679
1	2	5.7306	27976700	cyclopentanone	5	84.1164	3.20571e+11	1.74543e-05	0.00146819	0.0206	0.0712715
1	2	5.8756	384409	ketones	6	98.145	3.20571e+11	1.99857e-07	1.96149e-05	0.0206	0.00095218
1	2	6.0629	424068	2-cyclopenten-1-one	5	82.1005	3.20571e+11	2.64571e-07	2.17214e-05	0.0206	0.00105444
1	2	6.4194	7026358	2-cyclopenten-1-one	5	82.1005	3.20571e+11	4.38365e-06	0.0003599	0.0206	0.0174709
1	2	6.5342	5142995	2-methylcyclopentanone	6	98.143	3.20571e+11	2.67387e-06	0.000262422	0.0206	0.0127389
1	2	6.6369	2234648	3-methylcyclopentanone	6	98.143	3.20571e+11	1.16181e-06	0.000114023	0.0206	0.00553511
1	2	7.7486	9747748	other	7	130.185	3.20571e+11	4.34392e-06	0.000565513	0.0206	0.0274521
1	2	8.4495	154439	ketones	7	112.17	3.20571e+11	6.88232e-08	7.71987e-06	0.0206	0.000374751
1	2	8.5643	225321	ketones	7	112.17	3.20571e+11	1.00411e-07	1.1263e-05	0.0206	0.000546748
1	2	8.6549	312656	ketones	7	112.17	3.20571e+11	1.3933e-07	1.56286e-05	0.0206	0.000758669
1	2	9.1323	142336	other	5	111.099	3.20571e+11	8.88016e-08	9.86574e-06	0.0206	0.000478919
1	2	10.0204	269090	other	9	120.192	3.20571e+11	9.32677e-08	1.121e-05	0.0206	0.000544174
1	2	10.2621	302415	other	8	144.211	3.20571e+11	1.17921e-07	1.70055e-05	0.0206	0.000825509
1	2	10.6186	243071	other	8	122.164	3.20571e+11	9.47805e-08	1.15788e-05	0.0206	0.000562078
1	3	3.7245	19249312	C2-C4 acids	2	60.052	3.20571e+11	3.00235e-05	0.00180297	0.0206	0.0875228
1	3	3.9601	9905840	ketones	3	74.0785	3.20571e+11	1.03002e-05	0.000763024	0.0206	0.03704
1	3	4.9027	8517822	C2-C4 acids	3	74.0785	3.20571e+11	8.85693e-06	0.000656109	0.0206	0.0318499
1	3	5.3498	4450669	ketones	4	88.1051	3.20571e+11	3.47089e-06	0.000305804	0.0206	0.0148448
1	3	5.5854	1284373	other	3	58.0791	3.20571e+11	1.33551e-06	7.75651e-05	0.0206	0.00376529
1	3	5.7123	10037852	cyclopentanone	5	84.1164	3.20571e+11	6.26249e-06	0.000526778	0.0206	0.0255717
1	3	6.5702	105404698	2-cyclopenten-1-one	5	82.1005	3.20571e+11	6.57606e-05	0.00539898	0.0206	0.262087
1	3	6.7092	1494134	3-methylcyclopentanone	6	98.143	3.20571e+11	7.76809e-07	7.62384e-05	0.0206	0.00370089
1	3	7.2772	1221797	other	6	96.127	3.20571e+11	6.35219e-07	6.10617e-05	0.0206	0.00296416
1	3	7.3436	678643	simple phenols	6	94.1112	3.20571e+11	3.52831e-07	3.32053e-05	0.0206	0.00161191
1	3	7.8572	4856111	2-methyl-2-cyclopenten-1-one	6	96.1271	3.20571e+11	2.52472e-06	0.000242694	0.0206	0.0117813
1	3	7.966	16602029	2-methyl-2-cyclopenten-1-one	6	96.1271	3.20571e+11	8.63149e-06	0.000829721	0.0206	0.0402777
1	3	8.0445	7030642	other	6	110.111	3.20571e+11	3.65527e-06	0.000402484	0.0206	0.0195381
1	3	8.4191	979894	ketones	6	98.143	3.20571e+11	5.09453e-07	4.99992e-05	0.0206	0.00242715
1	3	8.558	638617	ketones	6	96.1271	3.20571e+11	3.32021e-07	3.19162e-05	0.0206	0.00154933
1	3	8.7031	2373043	ketones	7	112.17	3.20571e+11	1.05751e-06	0.00011862	0.0206	0.00575826
1	3	8.8783	837208	ketones	7	110.154	3.20571e+11	3.73088e-07	4.1097e-05	0.0206	0.001995
1	3	9.0837	1139103	other	5	111.099	3.20571e+11	7.10672e-07	7.89547e-05	0.0206	0.00383275
1	3	9.1683	1163653	other	5	111.099	3.20571e+11	7.25988e-07	8.06563e-05	0.0206	0.00391536
1	3	9.2408	726160	other	6	110.111	3.20571e+11	3.77535e-07	4.15706e-05	0.0206	0.00201799
1	3	9.3496	4577735	other	6	110.111	3.20571e+11	2.37999e-06	0.000262062	0.0206	0.0127215
1	3	9.7604	8886443	simple phenols	6	94.1112	3.20571e+11	4.62011e-06	0.000434805	0.0206	0.021107
1	3	10.1713	2819942	ketones	7	110.154	3.20571e+11	1.25666e-06	0.000138426	0.0206	0.0067197
1	3	11.3494	1904492	simple phenols	7	108.138	3.20571e+11	8.48706e-07	9.17772e-05	0.0206	0.0044552
1	3	12.1107	2274645	simple phenols	7	124.137	3.20571e+11	1.01366e-06	0.000125833	0.0206	0.00610838
1	3	13.2587	601317	other	10	130.186	3.20571e+11	1.87577e-07	2.442e-05	0.0206	0.00118544
1	4	6.4255	10599866	2-cyclopenten-1-one	5	82.1005	3.20571e+11	6.61312e-06	0.000542941	0.025	0.0217176
1	4	7.8755	2499936	2-methyl-2-cyclopenten-1-one	6	96.1271	3.20571e+11	1.29973e-06	0.000124939	0.025	0.00499758
1	4	8.1172	19172330	other	4	84.0734	3.20571e+11	1.49517e-05	0.00125704	0.025	0.0502816
1	4	9.3437	3783568	other	6	110.111	3.20571e+11	1.9671e-06	0.000216599	0.025	0.00866394
1	4	10.0023	61237104	simple phenols	6	94.1112	3.20571e+11	3.18375e-05	0.00299627	0.025	0.119851
1	4	10.2259	1015415	ketones	7	110.154	3.20571e+11	4.52503e-07	4.98449e-05	0.025	0.0019938
1	4	10.3104	1800411	ketones	7	110.154	3.20571e+11	8.02324e-07	8.83789e-05	0.025	0.00353516
1	4	11.1261	8472633	ketones	6	112.127	3.20571e+11	4.40497e-06	0.000493914	0.025	0.0197566
1	4	11.4524	23723808	simple phenols	7	108.138	3.20571e+11	1.05721e-05	0.00114325	0.025	0.0457299
1	4	11.7303	1249770	simple phenols	7	108.138	3.20571e+11	5.5694e-07	6.02262e-05	0.025	0.00240905
1	4	11.9478	44767315	simple phenols	7	108.138	3.20571e+11	1.99498e-05	0.00215733	0.025	0.0862932
1	4	12.1895	13845490	simple phenols	7	124.137	3.20571e+11	6.17002e-06	0.000765929	0.025	0.0306371
1	4	12.4795	2867026	complex phenols	8	122.164	3.20571e+11	1.11794e-06	0.000136572	0.025	0.00546289
1	4	13.0293	7561670	simple phenols	8	122.164	3.20571e+11	2.94852e-06	0.000360204	0.025	0.0144082
1	4	13.271	18176817	complex phenols	8	122.164	3.20571e+11	7.08768e-06	0.000865862	0.025	0.0346345
1	4	13.6456	27295175	simple phenols	8	122.164	3.20571e+11	1.06432e-05	0.00130022	0.025	0.0520088
1	4	13.7785	3977504	complex phenols	8	122.164	3.20571e+11	1.55095e-06	0.00018947	0.025	0.00757881
1	4	13.8813	3497757	complex phenols	9	136.191	3.20571e+11	1.21234e-06	0.000165109	0.025	0.00660437
1	4	14.0806	17684078	simple phenols	8	138.164	3.20571e+11	6.89554e-06	0.000952714	0.025	0.0381086
1	4	14.2075	2760175	complex phenols	9	136.191	3.20571e+11	9.56688e-07	0.000130292	0.025	0.00521169
1	4	14.4371	1566797	simple phenols	9	136.191	3.20571e+11	5.43058e-07	7.39596e-05	0.025	0.00295838
1	4	14.5459	1936879	complex phenols	9	136.191	3.20571e+11	6.7133e-07	9.14291e-05	0.025	0.00365716
1	4	14.6063	1679901	complex phenols	9	136.191	3.20571e+11	5.8226e-07	7.92986e-05	0.025	0.00317194
1	4	14.7211	2779026	other	9	136.191	3.20571e+11	9.63221e-07	0.000131182	0.025	0.00524728
1	4	14.7876	993757	complex phenols	9	136.191	3.20571e+11	3.4444e-07	4.69096e-05	0.025	0.00187639
1	4	15.0353	7907773	simple phenols	9	136.191	3.20571e+11	2.74087e-06	0.000373281	0.025	0.0149312
1	4	16.6847	1728181	other	11	164.244	3.20571e+11	4.90086e-07	8.04938e-05	0.025	0.00321975
1	5	9.2952	1437027	3-methyl-2-cyclopenten-1-one	6	96.1271	3.20571e+11	7.47119e-07	7.18184e-05	0.0165	0.00435263
1	5	11.3435	2225980	other	5	98.101	3.20571e+11	1.38876e-06	0.000136239	0.0165	0.00825689
1	5	13.5609	12354721	simple phenols	8	122.164	3.20571e+11	4.81747e-06	0.000588523	0.0165	0.0356681
1	5	13.9959	5352710	simple phenols	8	138.164	3.20571e+11	2.08718e-06	0.000288373	0.0165	0.0174771
1	5	14.2315	2096227	other	8	120.149	3.20571e+11	8.17381e-07	9.82071e-05	0.0165	0.00595194
1	5	14.5759	647444	complex phenols	9	136.191	3.20571e+11	2.24407e-07	3.05622e-05	0.0165	0.00185225
1	5	14.7028	2123834	complex phenols	9	136.191	3.20571e+11	7.36129e-07	0.000100254	0.0165	0.00607601
1	5	14.7693	896938	complex phenols	9	136.191	3.20571e+11	3.10882e-07	4.23394e-05	0.0165	0.00256602
1	5	15.0774	34332533	simple phenols	9	136.191	3.20571e+11	1.18998e-05	0.00162064	0.0165	0.0982209
1	5	15.2043	993886	complex phenols	9	136.191	3.20571e+11	3.44485e-07	4.69157e-05	0.0165	0.00284338
1	5	15.2647	1148676	complex phenols	9	136.191	3.20571e+11	3.98136e-07	5.42225e-05	0.0165	0.00328621
1	5	15.6393	1070517	complex phenols	9	134.175	3.20571e+11	3.71045e-07	4.97851e-05	0.0165	0.00301728
1	5	16.0139	3685498	complex phenols	9	134.175	3.20571e+11	1.27741e-06	0.000171396	0.0165	0.0103877
1	5	16.1106	2241659	other	10	150.218	3.20571e+11	6.99271e-07	0.000105043	0.0165	0.00636623
1	5	16.1891	1195247	complex phenols	10	150.218	3.20571e+11	3.7285e-07	5.60086e-05	0.0165	0.00339446
1	5	16.31	2624008	complex phenols	9	134.175	3.20571e+11	9.09492e-07	0.000122031	0.0165	0.00739583
1	5	16.3945	6250815	other	9	134.175	3.20571e+11	2.16656e-06	0.000290698	0.0165	0.0176181
1	5	17.0652	762857	ketones	10	164.201	3.20571e+11	2.37968e-07	3.90747e-05	0.0165	0.00236816
1	5	17.3552	1289795	other	11	164.244	3.20571e+11	3.65767e-07	6.0075e-05	0.0165	0.00364091
1	5	17.615	7431289	complex phenols	11	164.244	3.20571e+11	2.1074e-06	0.000346128	0.0165	0.0209775
1	5	18.2434	1189498	complex phenols	11	164.244	3.20571e+11	3.37324e-07	5.54035e-05	0.0165	0.00335779
1	5	18.3582	6161210	complex phenols	10	164.201	3.20571e+11	1.92195e-06	0.000315586	0.0165	0.0191264
2	1	3.6524	27474177	C2-C4 acids	2	60.052	3.0042e+11	4.57262e-05	0.00274595	0.0094	0.292122
2	1	3.8276	1721599	ketones	3	74.0785	3.0042e+11	1.91021e-06	0.000141506	0.0094	0.0150538
2	1	5.5858	19182453	cyclopentanone	5	84.1164	3.0042e+11	1.27704e-05	0.0010742	0.0094	0.114277
2	1	6.3048	5431404	2-cyclopenten-1-one	5	82.1005	3.0042e+11	3.61587e-06	0.000296865	0.0094	0.0315814
2	1	6.4256	4112965	2-methylcyclopentanone	6	98.143	3.0042e+11	2.28178e-06	0.000223941	0.0094	0.0238235
2	1	6.5283	1860506	3-methylcyclopentanone	6	98.143	3.0042e+11	1.03217e-06	0.0001013	0.0094	0.0107766
2	1	7.4588	395540	ketones	6	98.143	3.0042e+11	2.19437e-07	2.15362e-05	0.0094	0.00229109
2	1	7.5978	4455842	other	7	130.185	3.0042e+11	2.11886e-06	0.000275844	0.0094	0.0293451
2	1	7.6582	4894996	other	7	130.185	3.0042e+11	2.32769e-06	0.00030303	0.0094	0.0322372
2	1	7.7126	1447635	2-methyl-2-cyclopenten-1-one	6	96.1271	3.0042e+11	8.03116e-07	7.72013e-05	0.0094	0.0082129
2	1	7.8274	60441	other	5	68.117	3.0042e+11	4.02376e-08	2.74087e-06	0.0094	0.000291582
2	1	8.4195	225685	ketones	7	112.17	3.0042e+11	1.07319e-07	1.20379e-05	0.0094	0.00128063
2	1	8.5041	850662	ketones	7	112.17	3.0042e+11	4.0451e-07	4.53738e-05	0.0094	0.00482699
2	1	8.8847	568588	other	5	111.099	3.0042e+11	3.78528e-07	4.2054e-05	0.0094	0.00447383
2	2	3.725	42056644	C2-C4 acids	2	60.052	3.0042e+11	6.99963e-05	0.00420342	0.0105	0.400325
2	2	3.8761	21443574	ketones	3	74.0785	3.0042e+11	2.37929e-05	0.00176254	0.0105	0.167861
2	2	5.5799	11769640	cyclopentanone	5	84.1164	3.0042e+11	7.83545e-06	0.00065909	0.0105	0.0627705
2	2	6.3473	24148988	2-cyclopenten-1-one	5	82.1005	3.0042e+11	1.60768e-05	0.00131991	0.0105	0.125706
2	2	6.4318	4674967	ketones	6	98.143	3.0042e+11	2.59357e-06	0.000254541	0.0105	0.024242
2	2	6.5346	4337439	3-methylcyclopentanone	6	98.143	3.0042e+11	2.40632e-06	0.000236163	0.0105	0.0224917
2	2	7.0541	190315	other	7	126.15	3.0042e+11	9.04994e-08	1.14165e-05	0.0105	0.00108729
2	2	7.4348	478731	ketones	6	98.143	3.0042e+11	2.6559e-07	2.60658e-05	0.0105	0.00248245
2	2	7.6221	6181086	other	7	130.185	3.0042e+11	2.93926e-06	0.000382647	0.0105	0.0364425
2	2	7.6946	2593870	2-methyl-2-cyclopenten-1-one	6	96.1271	3.0042e+11	1.43902e-06	0.000138329	0.0105	0.0131742
2	2	8.4861	1505336	ketones	7	112.17	3.0042e+11	7.15824e-07	8.02936e-05	0.0105	0.00764701
2	2	10.1597	1154034	other	8	144.211	3.0042e+11	4.80175e-07	6.92467e-05	0.0105	0.00659492
2	3	3.3564	4876763	C2-C4 acids	2	60.052	3.0042e+11	8.11656e-06	0.000487416	0.0114	0.0427558
2	3	3.7854	5313490	ketones	3	74.0785	3.0042e+11	5.89562e-06	0.000436739	0.0114	0.0383104
2	3	5.2113	3584352	other	4	88.1051	3.0042e+11	2.98278e-06	0.000262798	0.0114	0.0230525
2	3	5.9666	1505922	2-cyclopenten-1-one	5	82.1005	3.0042e+11	1.00254e-06	8.23093e-05	0.0114	0.00722012
2	3	6.4439	101145731	2-cyclopenten-1-one	5	82.1005	3.0042e+11	6.73361e-05	0.00552833	0.0114	0.484941
2	3	7.1085	1633306	other	6	96.127	3.0042e+11	9.06123e-07	8.71028e-05	0.0114	0.0076406
2	3	7.1749	593952	other	5	66.1011	3.0042e+11	3.95414e-07	2.61373e-05	0.0114	0.00229275
2	3	7.4529	586817	ketones	6	98.143	3.0042e+11	3.25553e-07	3.19508e-05	0.0114	0.0028027
2	3	7.6885	5994478	2-methyl-2-cyclopenten-1-one	6	96.1271	3.0042e+11	3.32561e-06	0.000319681	0.0114	0.0280422
2	3	7.7731	19520350	2-methyl-2-cyclopenten-1-one	6	96.1271	3.0042e+11	1.08295e-05	0.00104101	0.0114	0.0913162
2	3	7.8456	935825	other	6	110.111	3.0042e+11	5.19175e-07	5.71667e-05	0.0114	0.00501462
2	3	8.0208	424285	other	4	86.0892	3.0042e+11	3.53076e-07	3.03961e-05	0.0114	0.00266632
2	3	8.4438	624200	other	8	110.197	3.0042e+11	2.59719e-07	2.86202e-05	0.0114	0.00251055
2	3	8.4981	2152455	other	8	110.197	3.0042e+11	8.95601e-07	9.86924e-05	0.0114	0.00865722
2	3	8.9875	888819	other	5	111.099	3.0042e+11	5.91717e-07	6.5739e-05	0.0114	0.00576658
2	3	9.6884	200452	other	8	126.196	3.0042e+11	8.34048e-08	1.05254e-05	0.0114	0.000923278
2	3	11.0418	145597	other	9	116.16	3.0042e+11	5.38494e-08	6.25513e-06	0.0114	0.000548696
2	4	6.3168	17735198	2-cyclopenten-1-one	5	82.1005	3.0042e+11	1.18069e-05	0.000969355	0.0102	0.0950348
2	4	6.6551	5869181	C2-C4 acids	4	88.1051	3.0042e+11	4.88414e-06	0.000430318	0.0102	0.042188
2	4	6.7276	3493822	other	4	86.0892	3.0042e+11	2.90744e-06	0.0002503	0.0102	0.0245392
2	4	7.1022	726302	other	7	96.1702	3.0042e+11	3.45374e-07	3.32147e-05	0.0102	0.00325634
2	4	7.1687	258328	simple phenols	6	94.1112	3.0042e+11	1.43315e-07	1.34875e-05	0.0102	0.00132231
2	4	7.35	221914	other	7	178.084	3.0042e+11	1.05525e-07	1.87924e-05	0.0102	0.00184239
2	4	7.6037	475716	other	6	110.111	3.0042e+11	2.63917e-07	2.90601e-05	0.0102	0.00284902
2	4	7.6883	8794860	2-methyl-2-cyclopenten-1-one	6	96.1271	3.0042e+11	4.8792e-06	0.000469023	0.0102	0.0459827
2	4	7.7729	14426320	2-methyl-2-cyclopenten-1-one	6	96.1271	3.0042e+11	8.00341e-06	0.000769344	0.0102	0.0754259
2	4	7.8817	12705468	other	6	110.111	3.0042e+11	7.04872e-06	0.000776139	0.0102	0.076092
2	4	8.1113	586779	other	6	110.111	3.0042e+11	3.25532e-07	3.58446e-05	0.0102	0.00351417
2	4	8.359	1959815	ketones	6	96.1271	3.0042e+11	1.08726e-06	0.000104515	0.0102	0.0102466
2	4	8.504	918660	ketones	7	110.154	3.0042e+11	4.36845e-07	4.81201e-05	0.0102	0.00471766
2	4	9.0961	2125920	other	6	110.111	3.0042e+11	1.17941e-06	0.000129866	0.0102	0.012732
2	4	9.1867	7474362	other	6	110.111	3.0042e+11	4.14661e-06	0.000456586	0.0102	0.0447634
2	4	9.2471	896014	other	5	82.1005	3.0042e+11	5.96507e-07	4.89735e-05	0.0102	0.00480133
2	4	9.3317	171901	other	6	110.111	3.0042e+11	9.53669e-08	1.05009e-05	0.0102	0.0010295
2	4	9.9359	1280496	ketones	7	110.154	3.0042e+11	6.08907e-07	6.70733e-05	0.0102	0.00657582
2	4	10.0024	5072128	ketones	7	110.154	3.0042e+11	2.41192e-06	0.000265682	0.0102	0.0260472
2	4	10.4858	172062	other	8	122.164	3.0042e+11	7.15922e-08	8.74602e-06	0.0102	0.000857453
2	4	10.5583	177251	other	8	124.18	3.0042e+11	7.37512e-08	9.15845e-06	0.0102	0.000897887
2	4	10.6005	899375	other	8	124.18	3.0042e+11	3.74215e-07	4.64702e-05	0.0102	0.0045559
2	4	11.0416	322137	other	9	116.16	3.0042e+11	1.19143e-07	1.38396e-05	0.0102	0.00135683
2	4	12.1533	206047	other	9	132.159	3.0042e+11	7.62069e-08	1.00714e-05	0.0102	0.000987397
2	4	12.25	995442	other	9	132.159	3.0042e+11	3.68166e-07	4.86566e-05	0.0102	0.00477025
2	4	12.3467	1632475	other	9	132.159	3.0042e+11	6.03774e-07	7.97943e-05	0.0102	0.00782297
2	4	12.5642	114006	other	10	134.218	3.0042e+11	3.79488e-08	5.09342e-06	0.0102	0.000499355
2	4	13.1261	1041217	other	10	130.186	3.0042e+11	3.46587e-07	4.51209e-05	0.0102	0.00442361
2	4	13.2288	464895	other	10	130.186	3.0042e+11	1.54748e-07	2.01461e-05	0.0102	0.00197511
2	4	13.543	67254	other	11	148.245	3.0042e+11	2.03515e-08	3.017e-06	0.0102	0.000295784
2	4	13.7122	178658	other	11	146.229	3.0042e+11	5.4063e-08	7.90558e-06	0.0102	0.000775057
2	4	13.7847	237047	other	11	146.229	3.0042e+11	7.17319e-08	1.04893e-05	0.0102	0.00102836
2	4	13.972	211268	other	11	146.229	3.0042e+11	6.3931e-08	9.34856e-06	0.0102	0.000916526
2	5	6.2867	1410108	2-cyclopenten-1-one	5	82.1005	3.0042e+11	9.38757e-07	7.70724e-05	0.0103	0.00748276
2	5	7.7126	373909	other	5	68.117	3.0042e+11	2.48924e-07	1.6956e-05	0.0103	0.00164621
2	5	7.9422	10672703	other	4	86.0892	3.0042e+11	8.88147e-06	0.000764599	0.0103	0.0742329
2	5	8.6793	1130990	other	5	98.0999	3.0042e+11	7.52938e-07	7.38632e-05	0.0103	0.00717118
2	5	9.1808	8782886	other	6	110.111	3.0042e+11	4.87255e-06	0.00053652	0.0103	0.0520893
2	5	9.6159	28323357	simple phenols	6	94.1112	3.0042e+11	1.57132e-05	0.00147879	0.0103	0.143572
2	5	9.6883	925773	simple phenols	6	94.1112	3.0042e+11	5.13599e-07	4.83354e-05	0.0103	0.00469276
2	5	10.0388	1165691	ketones	7	110.154	3.0042e+11	5.54314e-07	6.10598e-05	0.0103	0.00592813
2	5	10.0871	1630877	ketones	7	110.154	3.0042e+11	7.75521e-07	8.54266e-05	0.0103	0.00829384
2	5	10.4194	302170	other	5	68.117	3.0042e+11	2.01165e-07	1.37027e-05	0.0103	0.00133036
2	5	10.6853	930296	other	8	110.197	3.0042e+11	3.87081e-07	4.26551e-05	0.0103	0.00414127
2	5	10.794	694789	other	6	96.1271	3.0042e+11	3.85454e-07	3.70526e-05	0.0103	0.00359734
2	5	11.2472	7666224	simple phenols	7	108.138	3.0042e+11	3.64547e-06	0.000394214	0.0103	0.0382732
2	5	11.658	1095582	simple phenols	7	108.138	3.0042e+11	5.20976e-07	5.63372e-05	0.0103	0.00546963
2	5	12.0024	7848615	simple phenols	7	124.137	3.0042e+11	3.73221e-06	0.000463306	0.0103	0.0449811
2	5	12.2985	1186619	complex phenols	8	122.164	3.0042e+11	4.93733e-07	6.03166e-05	0.0103	0.00585598
2	5	12.3529	406901	other	9	132.159	3.0042e+11	1.50493e-07	1.98891e-05	0.0103	0.00193098
2	5	12.5402	638924	ketones	7	110.154	3.0042e+11	3.03824e-07	3.34673e-05	0.0103	0.00324925
2	5	12.9269	446704	other	9	134.175	3.0042e+11	1.65214e-07	2.21677e-05	0.0103	0.0021522
2	5	13.1202	297317	other	10	130.186	3.0042e+11	9.8967e-08	1.28842e-05	0.0103	0.00125089
2	5	13.2289	467265	other	10	130.19	3.0042e+11	1.55537e-07	2.02494e-05	0.0103	0.00196596
2	5	13.7123	333056	complex phenols	9	136.191	3.0042e+11	1.23181e-07	1.67762e-05	0.0103	0.00162876
2	5	13.7546	528489	other	10	128.171	3.0042e+11	1.75916e-07	2.25473e-05	0.0103	0.00218906
2	5	13.9902	383382	other	11	146.229	3.0042e+11	1.16014e-07	1.69646e-05	0.0103	0.00164705
2	5	14.0325	270850	other	10	146.189	3.0042e+11	9.0157e-08	1.318e-05	0.0103	0.00127961
2	5	14.1352	454980	other	9	146.189	3.0042e+11	1.68275e-07	2.46e-05	0.0103	0.00238835
2	5	14.2621	943657	other	10	146.186	3.0042e+11	3.14112e-07	4.59187e-05	0.0103	0.00445813
2	5	14.5521	440931	other	11	146.229	3.0042e+11	1.33428e-07	1.95111e-05	0.0103	0.00189428
2	5	14.818	398120	other	11	146.229	3.0042e+11	1.20474e-07	1.76167e-05	0.0103	0.00171036
2	5	14.9026	178655	other	11	144.213	3.0042e+11	5.40621e-08	7.79646e-06	0.0103	0.000756938
2	5	14.963	423812	other	11	144.213	3.0042e+11	1.28248e-07	1.84951e-05	0.0103	0.00179564
2	5	15.0476	503942	other	11	144.213	3.0042e+11	1.52496e-07	2.19919e-05	0.0103	0.00213514
2	5	15.1382	196413	other	11	144.213	3.0042e+11	5.94358e-08	8.57142e-06	0.0103	0.000832176
2	5	15.2953	508896	other	11	148.245	3.0042e+11	1.53995e-07	2.2829e-05	0.0103	0.0022164
2	5	20.4612	226257	other	10	146.186	3.0042e+11	7.53135e-08	1.10098e-05	0.0103	0.00106891
3	1	3.5317	17296573	C2-C4 acids	2	60.052	321000000000	2.69e-05	0.001617	0.0109	0.148344
3	1	3.8096	26598445	ketones	3	74.0785	321000000000	2.76e-05	0.002045	0.0109	0.187603
3	1	4.6373	113011	other	3	74.0785	321000000000	1.17e-07	8.69e-06	0.0109	0.000797
3	1	4.7763	155830	other	3	74.0785	321000000000	1.62e-07	1.2e-05	0.0109	0.001099
3	1	5.5497	3019901	cyclopentanone	5	84.1164	321000000000	1.88e-06	0.000158	0.0109	0.014512
3	1	5.9545	1012060	other	5	96.0841	321000000000	6.3e-07	6.06e-05	0.0109	0.005555
3	1	6.4016	70549825	2-cyclopenten-1-one	5	82.1005	321000000000	4.39e-05	0.003607	0.0109	0.33089
3	1	6.5466	1942628	3-methylcyclopentanone	6	98.143	321000000000	1.01e-06	9.89e-05	0.0109	0.009076
3	1	7.0904	369478	3-methyl-2-cyclopenten-1-one	6	96.1271	321000000000	1.92e-07	1.84e-05	0.0109	0.001691
3	1	7.3562	703836	other	7	96.1702	321000000000	3.13e-07	3.01e-05	0.0109	0.002762
3	1	7.4348	2444163	ketones	6	98.143	321000000000	1.27e-06	0.000124	0.0109	0.01142
3	1	7.7127	4661686	2-methyl-2-cyclopenten-1-one	6	96.1271	321000000000	2.42e-06	0.000233	0.0109	0.021333
3	1	8.2867	204362	ketones	7	112.17	321000000000	9.09e-08	1.02e-05	0.0109	0.000935
3	1	8.4921	2913531	ketones	7	112.17	321000000000	1.3e-06	0.000145	0.0109	0.013335
3	1	9.3621	122506	ketones	8	128.212	321000000000	4.77e-08	6.11e-06	0.0109	0.000561
3	1	9.5434	104234	ketones	8	126.196	321000000000	4.06e-08	5.12e-06	0.0109	0.00047
3	1	9.6824	160613	ketones	8	126.196	321000000000	6.25e-08	7.89e-06	0.0109	0.000724
3	1	10.5464	27570	other	9	120.192	321000000000	9.54e-09	1.15e-06	0.0109	0.000105
3	1	10.8485	121667	other	9	118.176	321000000000	4.21e-08	4.97e-06	0.0109	0.000456
3	1	11.3198	24221	other	10	134.218	321000000000	7.54e-09	1.01e-06	0.0109	9.29e-05
3	2	3.3804	8940507	C2-C4 acids	2	60.052	321000000000	1.39e-05	0.000836	0.011	0.075981
3	2	3.5979	14993	other	2	60.052	321000000000	2.33e-08	1.4e-06	0.011	0.000127
3	2	3.7369	11238659	ketones	3	74.0785	321000000000	1.17e-05	0.000864	0.011	0.078547
3	2	5.1749	1886332	ketones	4	88.1051	321000000000	1.47e-06	0.000129	0.011	0.01176
3	2	5.5435	412264	cyclopentanone	5	84.1164	321000000000	2.57e-07	2.16e-05	0.011	0.001963
3	2	5.9906	578187	other	5	96.0841	321000000000	3.6e-07	3.46e-05	0.011	0.003145
3	2	6.4195	98647380	2-cyclopenten-1-one	5	82.1005	321000000000	6.14e-05	0.005043	0.011	0.458466
3	2	6.5585	732538	3-methylcyclopentanone	6	98.143	321000000000	3.8e-07	3.73e-05	0.011	0.003391
3	2	7.0902	728389	3-methyl-2-cyclopenten-1-one	6	96.1271	321000000000	3.78e-07	3.63e-05	0.011	0.003303
3	2	7.3621	344020	other	6	96.1271	321000000000	1.79e-07	1.72e-05	0.011	0.00156
3	2	7.4346	1651422	ketones	6	98.143	321000000000	8.57e-07	8.41e-05	0.011	0.007646
3	2	7.7246	8428920	2-methyl-2-cyclopenten-1-one	6	96.1271	321000000000	4.37e-06	0.00042	0.011	0.038222
3	2	8.2925	149792	ketones	7	112.17	321000000000	6.66e-08	7.47e-06	0.011	0.000679
3	2	8.4919	2670611	ketones	7	112.17	321000000000	1.19e-06	0.000133	0.011	0.012112
3	2	10.1716	279311	other	8	144.211	321000000000	1.09e-07	1.57e-05	0.011	0.001425
3	3	3.3502	5473956	C2-C4 acids	2	60.052	321000000000	8.52e-06	0.000512	0.0112	0.04569
3	3	3.7671	3819689	ketones	3	74.0785	321000000000	3.96e-06	0.000294	0.0112	0.026219
3	3	4.2384	145468	other	3	74.0785	321000000000	1.51e-07	1.12e-05	0.0112	0.000999
3	3	4.8969	2342662	C2-C4 acids	3	74.0785	321000000000	2.43e-06	0.00018	0.0112	0.016081
3	3	5.2111	3461381	ketones	4	88.1051	321000000000	2.69e-06	0.000237	0.0112	0.021194
3	3	6.0147	1948925	other	5	96.0841	321000000000	1.21e-06	0.000117	0.0112	0.010411
3	3	6.4679	139000000	2-cyclopenten-1-one	5	82.1005	321000000000	8.64e-05	0.007097	0.0112	0.633686
3	3	6.5887	268478	2-cyclopenten-1-one	5	82.1005	321000000000	1.67e-07	1.37e-05	0.0112	0.001225
3	3	7.0962	1231523	other	6	96.1271	321000000000	6.39e-07	6.14e-05	0.0112	0.005485
3	3	7.1748	373392	other	5	66.1011	321000000000	2.33e-07	1.54e-05	0.0112	0.001372
3	3	7.4406	1289500	ketones	6	98.143	321000000000	6.69e-07	6.57e-05	0.0112	0.005863
3	3	7.7488	12580190	2-methyl-2-cyclopenten-1-one	6	96.1271	321000000000	6.53e-06	0.000628	0.0112	0.056028
3	3	8.2986	74313	ketones	7	112.17	321000000000	3.31e-08	3.71e-06	0.0112	0.000331
3	3	8.498	2547207	ketones	7	112.17	321000000000	1.13e-06	0.000127	0.0112	0.011346
3	3	8.6852	130131	ketones	7	110.15	321000000000	5.79e-08	6.38e-06	0.0112	0.000569
3	3	8.8967	265686	other	5	110.11	321000000000	1.65e-07	1.82e-05	0.0112	0.001626
3	3	9.5493	130313	ketones	8	126.196	321000000000	5.07e-08	6.4e-06	0.0112	0.000571
3	3	9.6882	196924	ketones	8	126.196	321000000000	7.66e-08	9.67e-06	0.0112	0.000864
3	3	10.1716	355557	other	8	144.211	321000000000	1.38e-07	2e-05	0.0112	0.001782
3	4	5.2111	9587410	ketones	4	88.1051	321000000000	7.46e-06	0.000657	0.0111	0.059232
3	4	5.622	413847	C2-C4 acids	2	74.0818	321000000000	6.44e-07	4.77e-05	0.0111	0.0043
3	4	5.7972	88483	other	5	102.132	321000000000	5.51e-08	5.63e-06	0.0111	0.000507
3	4	5.9966	2258746	2-cyclopenten-1-one	5	82.1005	321000000000	1.41e-06	0.000115	0.0111	0.010403
3	4	6.4618	121000000	2-cyclopenten-1-one	5	82.1005	321000000000	7.51e-05	0.006164	0.0111	0.555287
3	4	7.1144	1636693	other	6	96.1271	321000000000	8.49e-07	8.16e-05	0.0111	0.007355
3	4	7.1869	596542	other	5	66.1011	321000000000	3.71e-07	2.46e-05	0.0111	0.002212
3	4	7.4588	428917	ketones	6	98.143	321000000000	2.23e-07	2.18e-05	0.0111	0.001968
3	4	7.6763	3454498	2-methyl-2-cyclopenten-1-one	6	96.1271	321000000000	1.79e-06	0.000172	0.0111	0.015524
3	4	7.7729	18222482	2-methyl-2-cyclopenten-1-one	6	96.1271	321000000000	9.46e-06	0.000909	0.0111	0.081887
3	4	8.0207	120607	2-methyl-2-cyclopenten-1-one	6	96.1271	321000000000	6.26e-08	6.02e-06	0.0111	0.000542
3	4	8.504	2364134	other	8	110.197	321000000000	9.2e-07	0.000101	0.0111	0.009134
3	4	8.6913	212422	ketones	7	110.154	321000000000	9.45e-08	1.04e-05	0.0111	0.000938
3	4	8.9028	561551	other	6	142.176	321000000000	2.91e-07	4.14e-05	0.0111	0.003732
3	4	8.9934	538298	other	6	142.176	321000000000	2.79e-07	3.97e-05	0.0111	0.003578
3	4	9.6943	261640	ketones	8	126.196	321000000000	1.02e-07	1.28e-05	0.0111	0.001158
3	4	10.1777	178658	other	8	144.211	321000000000	6.95e-08	1e-05	0.0111	0.000903
3	4	11.0537	45357	other	9	116.16	321000000000	1.57e-08	1.82e-06	0.0111	0.000164
3	5	4.9576	12044141	C2-C4 acids	3	74.0785	321000000000	1.25e-05	0.000926	0.0102	0.090779
3	5	5.2113	16404281	other	4	86.0892	321000000000	1.28e-05	0.001099	0.0102	0.107767
3	5	5.7491	512138	C2-C4 acids	3	74.0785	321000000000	5.32e-07	3.94e-05	0.0102	0.00386
3	5	5.9605	1057869	2-cyclopenten-1-one	5	82.1005	321000000000	6.59e-07	5.41e-05	0.0102	0.005302
3	5	6.1297	230134	other	5	102.132	321000000000	1.43e-07	1.46e-05	0.0102	0.001435
3	5	6.4258	79339099	2-cyclopenten-1-one	5	82.1005	321000000000	4.94e-05	0.004056	0.0102	0.39765
3	5	7.1146	2390030	other	6	96.1271	321000000000	1.24e-06	0.000119	0.0102	0.011688
3	5	7.181	863084	simple phenols	6	94.1112	321000000000	4.48e-07	4.21e-05	0.0102	0.004132
3	5	7.6885	7305078	2-methyl-2-cyclopenten-1-one	6	96.1271	321000000000	3.79e-06	0.000364	0.0102	0.035724
3	5	7.7913	28491832	2-methyl-2-cyclopenten-1-one	6	96.1271	321000000000	1.48e-05	0.001421	0.0102	0.139333
3	5	8.0269	718478	other	3	58.0791	321000000000	7.46e-07	4.33e-05	0.0102	0.004246
3	5	8.4982	1849720	ketones	7	110.154	321000000000	8.23e-07	9.06e-05	0.0102	0.008885
3	5	9.5555	80461	ketones	8	126.196	321000000000	3.13e-08	3.95e-06	0.0102	0.000387
3	5	9.9664	157123	other	8	118.133	321000000000	6.11e-08	7.22e-06	0.0102	0.000708
3	5	10.492	120353	other	8	122.164	321000000000	4.68e-08	5.72e-06	0.0102	0.000561
3	5	11.0479	168493	other	9	116.16	321000000000	5.83e-08	6.77e-06	0.0102	0.000664
3	5	11.8756	72312	other	10	134.218	321000000000	2.25e-08	3.02e-06	0.0102	0.000296
3	5	11.9179	48448	other	10	132.202	321000000000	1.51e-08	1.99e-06	0.0102	0.000196
3	6	5.2172	1591148	ketones	4	88.1051	321000000000	1.24e-06	0.000109	0.011	0.00992
3	6	5.4105	3013177	other	4	86.0892	321000000000	2.35e-06	0.000202	0.011	0.018355
3	6	5.5676	7011468	other	4	102.089	321000000000	5.46e-06	0.000557	0.011	0.050649
3	6	6.347	32553615	2-cyclopenten-1-one	5	82.1005	321000000000	2.03e-05	0.001664	0.011	0.151294
3	6	7.1083	2215762	2-methyl-2-cyclopenten-1-one	6	96.1271	321000000000	1.15e-06	0.000111	0.011	0.010048
3	6	7.1748	983371	simple phenols	6	94.1112	321000000000	5.1e-07	4.8e-05	0.011	0.004366
3	6	7.6883	10367308	2-methyl-2-cyclopenten-1-one	6	96.1271	321000000000	5.38e-06	0.000517	0.011	0.047012
3	6	7.8031	33479903	2-methyl-2-cyclopenten-1-one	6	96.1271	321000000000	1.74e-05	0.00167	0.011	0.151818
3	6	7.8756	4989987	other	6	110.111	321000000000	2.59e-06	0.000285	0.011	0.025919
3	6	7.9482	3289277	other	6	110.111	321000000000	1.71e-06	0.000188	0.011	0.017085
3	6	8.1234	675492	other	6	110.111	321000000000	3.51e-07	3.86e-05	0.011	0.003509
3	6	8.3046	159917	ketones	6	96.1271	321000000000	8.3e-08	7.98e-06	0.011	0.000725
3	6	8.365	1352195	ketones	6	96.1271	321000000000	7.02e-07	6.74e-05	0.011	0.006132
3	6	8.504	2310930	ketones	7	110.154	321000000000	1.03e-06	0.000113	0.011	0.010293
3	6	8.6974	1661412	ketones	7	110.154	321000000000	7.39e-07	8.14e-05	0.011	0.0074
3	6	8.9874	506009	ketones	7	112.17	321000000000	2.25e-07	2.52e-05	0.011	0.002295
3	6	9.0901	247154	other	7	106.122	321000000000	1.1e-07	1.17e-05	0.011	0.001061
3	6	9.1565	461583	other	6	110.111	321000000000	2.4e-07	2.64e-05	0.011	0.002398
3	6	9.2351	388356	other	5	82.1005	321000000000	2.42e-07	1.99e-05	0.011	0.001805
3	6	9.7003	221971	other	8	126.196	321000000000	8.64e-08	1.09e-05	0.011	0.000991
3	6	9.8997	477044	other	8	118.133	321000000000	1.86e-07	2.19e-05	0.011	0.001994
3	6	9.9843	1920577	ketones	7	110.154	321000000000	8.54e-07	9.41e-05	0.011	0.008554
3	6	10.4193	267272	other	8	122.164	321000000000	1.04e-07	1.27e-05	0.011	0.001155
3	6	10.4858	833006	other	8	122.164	321000000000	3.24e-07	3.96e-05	0.011	0.0036
3	6	10.6006	781642	ketones	8	124.18	321000000000	3.04e-07	3.78e-05	0.011	0.003434
3	6	10.7577	305230	3-methyl-2-cyclopenten-1-one	6	96.1271	321000000000	1.58e-07	1.52e-05	0.011	0.001384
3	6	10.9812	228857	other	9	116.16	321000000000	7.92e-08	9.2e-06	0.011	0.000836
3	6	11.0477	812241	other	9	116.16	321000000000	2.81e-07	3.26e-05	0.011	0.002967
3	6	12.3467	177806	other	9	136.191	321000000000	6.15e-08	8.38e-06	0.011	0.000762
3	6	12.5642	150645	other	10	134.218	321000000000	4.69e-08	6.3e-06	0.011	0.000572
3	6	12.9328	268113	other	10	132.202	321000000000	8.35e-08	1.1e-05	0.011	0.001003
3	6	13.1382	290968	other	10	132.202	321000000000	9.06e-08	1.2e-05	0.011	0.001089
3	6	19.5004	166675	other	5	96.0841	321000000000	1.04e-07	9.97e-06	0.011	0.000907

## Sheet: Figure_2
Figure 2B_OD600 measurements
Time(h)	EM42_10mM_CP			RH300_10mM_CP			EM42_2.5mM_2CP			RH300_2.5mM_2CP
0	0.227	0.175	0.36	0.231	0.326	0.229	0.326	0.15	0.237	0.27	0.286	0.228
24	0.281	0.078	0.235	0.174	0.368	0.218	0.152	0.077	0.157	0.032	0.263	0.106
48	0.189	0.098	0.256	0.194	0.304	0.191	0.063	0.06	0.076	0.025	0.124	0.019
72	0.158	0.146	0.178	0.19	0.206	0.182	0.136	0.08	0.155	0.048	0.185	0.081
96	0.206	0.207	0.258	0.22	0.326	0.141	0.128	0.085	0.151	0.041	0.256	0.14
120	0.197	0.167	0.223	0.315	0.309	0.225	0.139	0.126	0.127	0.078	0.154	0.104
144	0.284	0.167	0.223	0.703	0.495	0.534	0.157	0.144	0.156	0.126	0.121	0.112
168	0.326	0.197	0.302	1.12	0.908	0.849	0.194	0.158	0.117	0.147	0.105	0.091
192	0.208	0.194	0.205	1.28	1.21	1.1	0.157	0.12	0.19	0.187	0.157	0.132
216	0.261	0.152	0.236	1.38	1.36	1.23	0.135	0.137	0.144	0.162	0.174	0.119
Figure 2C_OD600 and Concentration measurements
Time (h)	RH300_OD600			RH300_Methanol (mM)			Blank_Methanol (mM)			RH300_CP (mM)			Blank_CP (mM)			RH300_2-mCP (mM)			Blank_2-mCP (mM)			RH300_2-m-2-CP (mM)			Blank_2-m-2-CP (mM)
0	0.191	0.183	0.152	14.939	16.6944	16.5118		16.5		11.0424	11.3006	11.5883		11.8953		0.870834	0.873254	0.875024		0.884971		1.46921	1.51151	1.5292		1.54852
24	1.283	1.816	1.656	18.9363	18.2852	17.5826		16.688		2.22822	2.39799	3.64635		10.3095		0	0	0		0.728608		1.00575	1.02587	1.11378		1.52739
48	2.781	2.885	2.07	6.1991	5.89504	10.389		14.0819		0	0	0		11.4269		0	0	0		0.609316		0	0	0.795347		1.4953
72	2.745	3.256	2.857	0	0	0		12.6234		0	0	0		10.4067		0	0	0		0.482304		0	0	0		1.50747

## Sheet: Figure_3
Figure 3A_OD600 measurements
Time (h)	EM42 _10mM_D-Glu_10mM_CP			RH300 _10mM_D-Glu_10mM_CP			AJB137_10mM_D-Glu_10mM_CP			AJB186_10mM_D-Glu_10mM_CP			Blank_10mM_D-Glu_10mM_CP
0	0.1688	0.3215	0.138	0.1998	0.1556	0.1336	0.3261	0.281	0.2221	0.24	0.2355	0.2132	0	0.0128	0
6	1.4732	2.1917	1.8402	1.2296	0.7952	1.069	1.015	1.258	1.4257	1.0258	1.6435	1.419	0	0	0.017
12	1.8238	1.7698	1.9827	1.5541	1.7099	1.7833	1.5287	1.466	1.8442	1.5733	1.447	1.4595	0.0629	0.2477	0.2952
24	1.7177	1.9561	1.6665	2.3851	2.2373	2.2519	1.597	1.459	1.4552	1.5348	1.389	1.5224	0	0	0
48	1.4331	1.6845	1.4871	2.7445	2.6805	2.8094	1.6094	1.609	1.463	1.3798	1.3798	1.3975	0	0	0
72	1.3981	1.5123	1.31	2.6238	2.6003	2.976	1.6171	1.333	1.482	1.4518	1.3685	1.31	0.0043	0	0
Figure 3B_Metabolite_Concentrations (mM)
Time (h)	EM42_[cyclopentanone]			RH300_[cyclopentanone]			AJB137_[cyclopentanone]			Blank_[cyclopentanone]			EM42_[glutarate]			RH300_[glutarate]			AJB137_[glutarate]									Blank_[glutarate]
0	9.44271	9.4678	9.47092	9.45444	9.35085	9.40789	9.45107	9.37644	9.39903	9.32476	9.31041	9.34748	0	0	0	0	0	0	0	0	0							0	0	0
6	9.33824	9.42549	9.37856	5.83625	7.40027	5.69733	5.86658	5.43073	4.27059	8.93223	9.00474	9.04631	0	0	0	0	0	0	0	0	0							0	0	0
12	9.49189	9.32039	9.4175	0	0	0	0	0	0	9.00137	8.69071	8.9522	0	0	0	0	0	0	0.340599	0.346352	0.406373							0	0	0
24	9.36558	9.30167	9.34486	0	0	0	0	0	0	8.74501	8.5327	8.82876	0	0	0	0	0	0	3.58977	3.7176	3.87224							0	0	0
48	8.70582	8.57164	8.59561	0	0	0	0	0	0	7.87793	7.72616	7.97317	0	0	0	0	0	0	6.45519	6.51287	7.03088							0	0	0
72	7.93198	7.97292	7.80242	0	0	0	0	0	0	7.31702	6.97741	7.54493	0	0	0	0	0	0	8.28618	8.57122	8.53186							0	0	0
Figure 3C_Metabolite_Concentrations (mM)
Time (h)	EM42_[2-cyclopenten-1-one]			RH300_[2-cyclopenten-1-one]			AJB137_[2-cyclopenten-1-one]			Blank_[2-cyclopenten-1-one]			EM42_[glutarate]			RH300_[glutarate]			AJB137_[glutarate]			Blank_[glutarate]
0	2.36807	2.34337	2.3863	2.36745	2.34021	2.3729	2.38707	2.37982	2.35638	2.39616	2.36323	2.38066	0	0	0	0	0	0	0	0	0	0	0	0
6	0	0.0159094	0.0142291	0.324135	0.0129994	0.0138706	0.152624	0.0166402	0	2.37759	2.4028	2.44843	0	0	0	0	0	0	0	0	0	0	0	0
12	0.0134684	0.0128985	0.0122614	0	0	0	0	0	0	2.39827	2.39733	2.38134	0	0	0	0	0	0	0.264828	0.236251	0.206184	0	0	0
24	0	0.0131349	0.0125928	0	0	0	0	0	0	2.4146	2.38513	2.40301	0	0	0	0	0	0	0.835671	0.997239	0.856967	0	0.0266273	0
48	0	0	0	0	0	0	0	0	0	2.4	2.4	2.38	0	0	0	0	0	0	1.75661	1.72155	1.6034	0	0	0
72	0	0	0	0	0	0	0	0	0	2.4	2.4	2.38	0	0	0	0	0	0	2.06949	2.19453	2.08345	0	0	0

## Sheet: Figure_4
Figure 4B_Metabolite_Concentrations (mM)
Time (h)	AJB137_[2-methylcyclopentanone]			Blank_[2-methylcyclopentanone]			AJB137_normalized_[2-methylcyclopentanone]			Blank_normalized_[2-methylcyclopentanone]			AJB137_[5-hydroxyhexanoic acid]			Blank_[5-hydroxyhexanoic acid]			AJB137_[5-methyl-5-oxovaleric acid]			Blank_[5-methyl-5-oxovaleric acid]			AJB137_[2-methylglutaric acid]			Blank_[2-methylglutaric acid]			AJB137_[5-oxohexanoic acid]			Blank_[5-oxohexanoic acid]
0	6.67508	6.34779	5.47104	6.62535	7.21949	6.81025	9.53583	9.06828	7.81577	9.46479	10.3136	9.72893	0.0309177	0.0300269	0.030633	0.0275522	0.0278748	0.0272128	0	0	0	0	0	0	0	0	0	0	0	0	0.114431	0.112386	0.111341	0.108139	0.105559	0.102504
6	5.32493	5.95608	5.33194	6.33676	5.92644	5.98596	7.60704	8.50868	7.61706	9.05251	8.46634	8.55137	1.47369	0.926638	1.59293	0.0296434	0.0283933	0.0259221	0	0	0	0	0	0	0	0	0	0	0	0	0.106121	0.117181	0.11183	0.126018	0.116509	0.110473
12	0	0	0	6.10199	4.39127	6.51133	0	0	0	8.71713	6.27324	9.3019	12.2103	11.6172	11.275	0.0255774	0.025789	0.0240551	0	0	0	0	0	0	0	0	0	0	0	0	0.0640036	0.0848949	0.0467423	0.105341	0.101019	0.0958845
24	0	0	0	5.4082	5.18499	5.7547	0	0	0	7.726	7.40713	8.221	9.89857	9.60062	9.35958	0.0211383	0.0217994	0.0211588	0	0	0	0	0	0	0.0254378	0.0212914	0.0247418	0	0	0	0	0	0	0.0943463	0.0885359	0.0880085
Figure 4D_Metabolite_Concentrations (mM)
Time (h)	AJB137 3-methylcyclopentanone			Blank 3-methylcyclopentanone			AJB137 3-methylglutaric acid			Blank 3-methylglutaric acid			AJB137 3-methyl-5-hydroxypentanoic acid			Blank 3-methyl-5-hydroxypentanoic acid			AJB137 4-methyl-5-hydroxypentanoic acid			Blank 4-methyl-5-hydroxypentanoic acid
0	9.56	10.73	9.45	9.79	10.24	11.63	0	0	0	0	0	0	0	0	0	0	0	0	0	0	0	0	0	0
6	5.15	5.28	7.45	10.23	9.4	10.1	0	0	0	0	0	0	1.46	1.14	0.66	0	0	0	3.62	2.88	1.66	0	0	0
12	0.09	0.13	0.07	9.27	7.37	10.12	0.03	0.02	0.03	0	0	0	3.65	3.38	3.19	0	0	0	7.52	6.9	6.51	0	0	0
24	0	0	0	7.56	8.33	7.79	0.09	0.11	0.09	0	0	0	2.91	3.39	3.33	0	0	0	6.32	6.94	6.85	0	0	0

## Sheet: Figure_5
Figure 5B_OD600 measurements
Time (h)	RH300_10mM_CP			AJB185_10mM_CP			AJB196_10mM_CP			AJB197_10mM_CP
0	0.274	0.175	0.197	0.259	0.169	0.096	0.138	0.112	0.34	0.031	0.249	0.175
24	0.246	0.244	0.323	0.213	0.259	0.158	0.154	0.176	0.29	0.236	0.129	0.153
48	0.272	0.308	0.169	0.335	0.256	0.166	0.298	0.31	0.231	0.163	0.306	0.236
72	0.271	0.204	0.191	0.272	0.205	0.342	0.189	0.221	0.259	0.157	0.228	0.235
96	0.141	0.173	0.217	0.606	0.53	0.493	0.437	0.665	0.559	0.116	0.189	0.127
120	0.123	0.132	0.141	1.03	0.969	1.053	0.804	0.932	1.063	0.111	0.254	0.299
144	0.452	0.323	0.43	1.173	1.132	1.111	1.011	1.081	1.168	0.152	0.156	0.259
168	0.783	0.682	0.768	1.212	1.134	1.14	1.196	1.157	1.207	0.379	0.196	0.462
192	0.986	0.917	0.917	1.011	1.15	1.098	1.089	1.09	1.1	0.601	0.316	0.613
Figure 5C_Concentrations (mM)
Time (h)	EM42 (AJB005)_[cyclopentanone]			RH300 (AJB138)_[cyclopentanone]			AJB137_10mM_[cyclopentanone]			AJB186_[cyclopentanone]			Blank_[cyclopentanone]			EM42 (AJB005)_[glutarate]			RH300 (AJB138)_[glutarate]			AJB137_10mM_[glutarate]			AJB186_[glutarate]			Blank_[glutarate]
0	9.44271	9.4678	9.47092	9.45444	9.35085	9.40789	9.45107	9.37644	9.39903	9.44708	9.32651	9.3305	9.32476	9.31041	9.34748	0	0	0	0	0	0	0	0	0	0	0	0	0	0	0
6	9.33824	9.42549	9.37856	5.83625	7.40027	5.69733	5.86658	5.43073	4.27059	6.01173	6.10547	5.64091	8.93223	9.00474	9.04631	0	0	0	0	0	0	0	0	0	0	0	0	0	0	0
12	9.49189	9.32039	9.4175	0	0	0	0	0	0	0	0	0	9.00137	8.69071	8.9522	0	0	0	0	0	0	0.340599	0.346352	0.406373	0.379958	0.332501	0.390705	0	0	0
24	9.36558	9.30167	9.34486	0	0	0	0	0	0	0	0	0	8.74501	8.5327	8.82876	0	0	0	0	0	0	3.58977	3.71761	3.87224	3.74447	3.94089	3.79155	0	0	0
48	8.70582	8.57164	8.59561	0	0	0	0	0	0	0	0	0	7.87793	7.72616	7.97317	0	0	0	0	0	0	6.45519	6.51287	7.03088	6.74402	6.15032	6.22676	0	0	0
72	7.93198	7.97292	7.80242	0	0	0	0	0	0	0	0	0	7.31702	6.97741	7.54493	0	0	0	0	0	0	8.28618	8.57122	8.53186	8.15365	8.18286	8.05911	0	0	0

## Sheet: Figure_6
Time(h)	AJB137_10mM_Glu_5mM_2CP			AJB195_10mM_Glu_5mM_2CP			AJB171_10mM_Glu_5mM_2CP			AJB137_10mM_Glu_2.5mM_2CP			AJB195_10mM_Glu_2.5mM_2CP
0	0.2494	0.2031	0.2024	0.2031	0.1715	0.194	0.2531	0.2782	0.283	0.2944	0.2855	0.2399	0.2511	0.3169	0.2019
2	0.188	0.2018	0.19	0.129	0.1705	0.128	0.0648	0.2334	0.1261	0.1085	0.0518	0.1129	0.06	0.2018	0.166
4	0.0957	0.0598	0.0985	0.1211	0.1451	0.0131	0.0316	0.0104	0.1383	0.1704	0.0694	0.1441	0.1719	0.2203	0.2719
6	0.0561	0.1554	0.1277	0.0754	0.1451	0.0534	0.0548	0.0251	0.1584	0.4009	0.4156	0.4595	0.6367	0.5824	0.8
8	0.1957	0.1059	0.0568	0.1401	0.1894	0.2652	0.1356	0.1386	0.1645	1.5337	1.2865	1.6807	1.8021	1.7569	1.8801
10	0.1453	0.0639	0.0699	0.1048	0.1987	0.1807	0.0895	0.1422	0.1645	1.9171	1.8109	1.695	1.8392	1.7013	1.6153
12	0.1159	0.1252	0.1129	0.2483	0.3343	0.3038	0.1391	0.2015	0.1853	1.7527	1.8053	1.7158	1.795	1.5888	1.6182
14	0.1229	0.1039	0.1284	0.9522	0.8289	0.9003	0.8294	0.8017	0.7782
22	0.2584	0.1292	0.6908	1.2753	1.2892	1.3174	1.3906	1.3608	1.4444
24	0.3809	0.0984	1.1326	1.2293	1.2399	1.2291	1.2435	1.2399	1.1869
Time (h)	AJB137_[2CP]			AJB195_[2CP]			Blank_[2CP]			AJB137_[glutarate]			AJB195_[glutarate]			Blank_[glutarate]
0	2.39	2.37	2.38	2.39	2.39	2.4	2.36	2.37	2.38	0	0	0	0	0	0	0	0	0
6	0	0	0.1	1.22	1.14	1.05	2.39	2.38	2.36	0	0	0	0	0	0	0	0	0
12	0	0	0	0	0	0	2.37	2.36	2.37	0.23	0.31	0.23	0.25	0.24	0.22	0	0	0
24	0	0	0	0	0	0	2.38	2.37	2.34	0.96	1.05	0.95	0.88	0.89	0.9	0	0	0
48	0	0	0	0	0	0	2.4	2.35	2.32	2.06	2.22	2.07	2.04	2.11	2.11	0	0	0
72	0	0	0	0	0	0	2.36	2.35	2.32	2.62	2.73	2.6	2.57	2.66	2.74	0	0	0

## Sheet: S.Figure_1
Concentration [mM]	AJB137_2CP			AJB137_3m-2CP			AJB137 2m-2CP			AJB137 CP			AJB137 2mCP			AJB137 3mCP
0	1.9709	1.7354	1.7995	1.6253	1.5747	1.4508	1.6057	1.686	1.4558	1.641	1.684	1.8413	1.8005	2.0263	1.8766	1.7376	1.7758	1.795
1.25	1.5606	1.5301	1.691	1.6572	1.7544	1.5434	1.2678	1.3047	1.2068
2.5	1.5667	1.732	1.579	1.7087	1.657	1.5747	1.5138	1.177	1.2924
5	0.1609	0.0298	0.0429	1.5496	1.4569	1.6508	0.9886	0.9829	0.8975
10	0.0645	0.0602	0.0214	1.4143	1.4264	1.3841	0.7209	0.9201	0.9145	1.3914	1.3972	1.2438	1.3986	1.219	1.6462	1.2579	1.5152	1.2466
20										1.2049	1.074	1.1828	0.8503	0.751	0.7505	0.8517	0.8776	0.9776
40										0.9681	1.139	1.042	0.6145	0.6626	0.6868	0.3402	0.8933	0.6943
80										1.0741	0.916	0.9524	0.191	0.0838	0.0375	0.0256	0.0256	0.047

## Sheet: S.Figure_2
Supplemental Figure 1 OD600 measurements
Time (h)	RH300
0	0.191	0.183	0.152
24	1.283	1.816	1.656
48	2.781	2.885	2.07
72	2.745	3.256	2.857
Supplemental Figure 1 Concentration measurements
Time (h)	RH300_Methanol (mM)			Blank_Methanol (mM)
0	14.939	16.6944	16.5118		16.5
24	18.9363	18.2852	17.5826		16.688
48	6.1991	5.89504	10.389		14.0819
72	0	0	0		12.6234

## Sheet: S.Figure_3
	Time (h)	AJB137_[cyclopentanone]			AJB217_[cyclopentanone]			Blank_[cyclopentanone]			AJB137_[glutaric acid]			AJB217_[glutaric acid]			Blank_[glutaric acid]
	0	7.17661	7.16627	7.23784	7.21846	7.25767	7.18465	7.26044	7.25763	7.23309	0	0	0	0	0	0	0	0	0
	4	5.77527	5.53042	5.51591	5.62849	5.4484	5.6704	7.20955	7.17442	7.17177	0	0	0	0	0	0	0	0	0
	8	0.462636	0.098864	1.26423	0.472869	1.40752	0.082758	7.2362	7.22489	7.23535	0.108864	0.133184	0.106101	0.117826	0.126079	0.225091	0	0	0
	12	0	0	0	0	0.186614	0	7.0702	7.02519	7.08063	0.571108	0.561803	0.535796	0.59276	0.462613	0.52917	0	0	0
	24	0	0	0	0	0	0	6.86899	6.83358	6.90036	3.97496	4.02124	3.77271	4.51368	4.24476	4.19503	0	0	0
	48	0	0	0.075772	0	0	0	6.23961	6.13985	6.27269	7.74083	8.19298	7.95534	8.45999	8.37639	8.17816	0	0	0
