# Supplementary material for: Biological conversion of cyclic ketones from catalytic fast pyrolysis with Pseudomonas putida KT2440
Source: Royal Society of Chemistry journal article supplement (doi:10.1039/d3gc00084b), 2023-01-01
Supplement: d3gc00084b2.pdf [file d3gc00084b2.pdf]

**Supplementary Information for:**

**Biological conversion of cyclic ketones from catalytic fast pyrolysis with *Pseudomonas putida* KT2440**

Andrew J. Borchert,<sup>1</sup> A. Nolan Wilson,<sup>1</sup> William E. Michener,<sup>1</sup> Joseph Roback,<sup>1,2</sup> William R. Henson,<sup>1,3</sup> Kelsey J. Ramirez,<sup>1</sup> Gregg T. Beckham<sup>1\*</sup>

<sup>1</sup>Renewable Resources and Enabling Sciences Center, National Renewable Energy Laboratory, Golden CO, United States

<sup>2</sup>Current Address: Department of Chemical and Biological Engineering, University of Colorado Boulder, Boulder CO, United States

<sup>3</sup>Current Address: Battelle, Columbus OH, United States

\*Corresponding author: gregg.beckham@nrel.gov

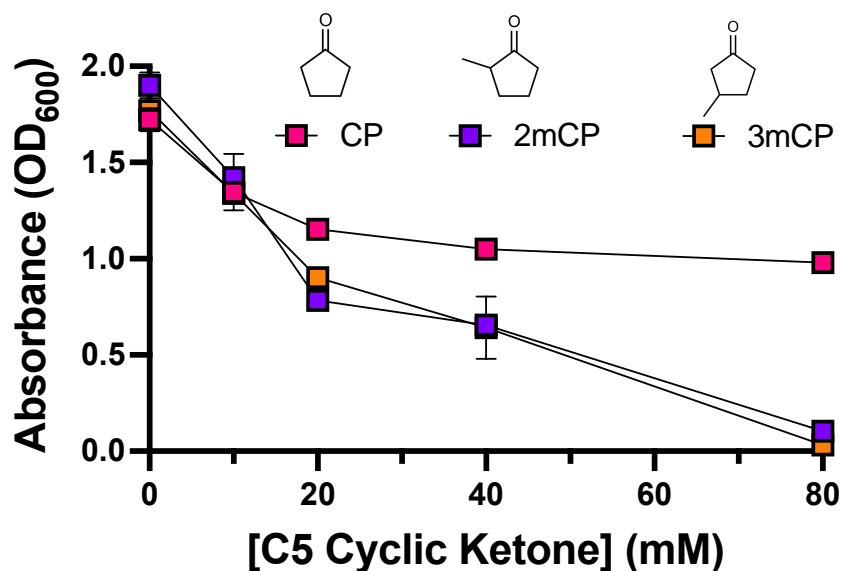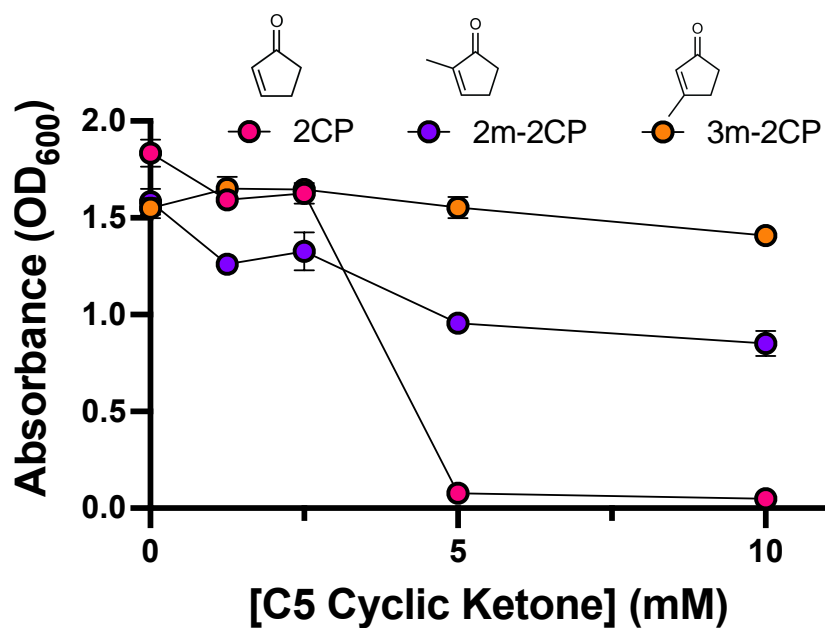

**Supplementary Figure 1. Tolerance of AJB137 Against Different Cyclic Ketones.** AJB137 was grown in M9 medium containing 10 mM D-glucose and supplemented with varying concentrations of cyclopentanone (CP), 2-methylcyclopentanone (2mCP), 3-methylcyclopentanone (3mCP), 2-cyclopenten-1-one (2CP), 2-methyl-2-cyclopenten-1-one (2m-2CP), and 3-methyl-2-cyclopenten-1-one (3m-2CP). AJB137 cultures were inoculated to an initial absorbance at 600 nm (OD<sub>600</sub>) of ~ 0.15 and growth was assessed by measuring the OD<sub>600</sub> after 24 h. Data represent the mean from three biological replicates and error bars denote the standard error of the mean.

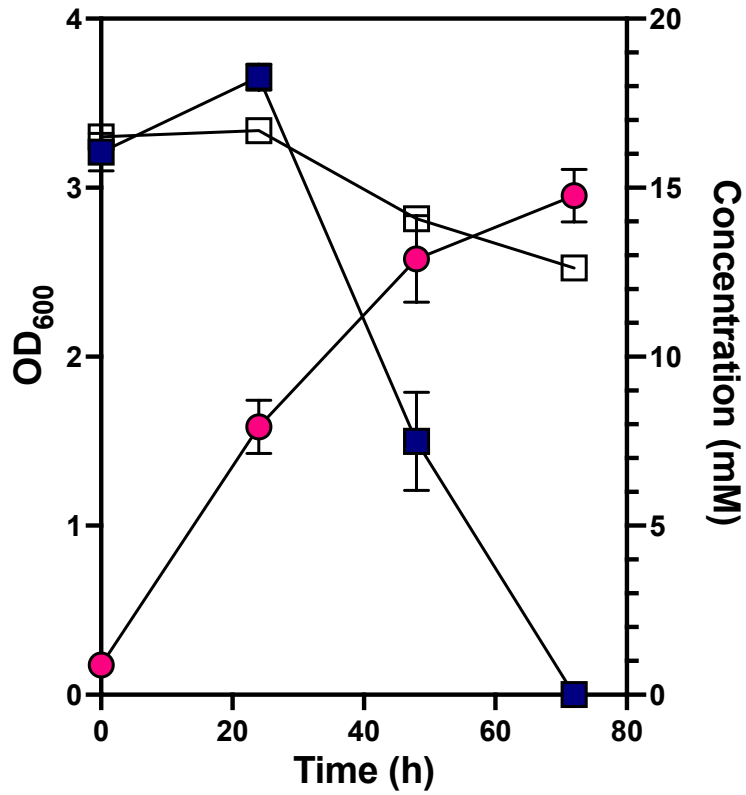

**Supplementary Figure 2. Consumption of methanol by *P. putida* RH300.** RH300 was grown in M9 medium containing 10 mM D-glucose and supplemented with the reduced and methanol-depleted cyclic ketone rich CFP fraction to an approximate initial cyclopentanone concentration of ~ 10 mM at 30 °C for 72 h. Methanol (blue squares) concentration was tracked for biological samples (filled shapes) as well as an abiotic control (empty shapes). Growth of RH300 was measured using absorbance at 600 nm (OD<sub>600</sub>, pink circles). Data represent the mean from three biological replicates and error bars denote the standard error of the mean.

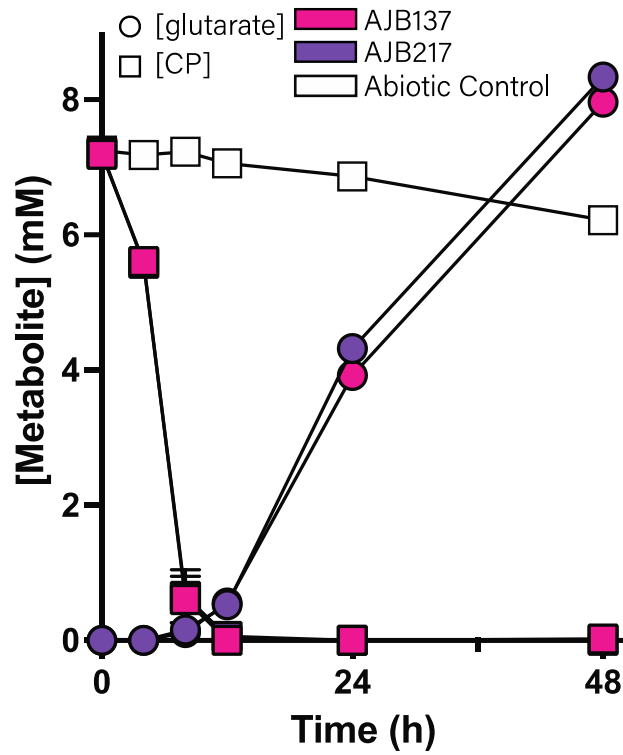

**Supplementary Figure 3. Loss of the *paaZ* operon does not alter glutaric acid production in the AJB137 background.** AJB137 and AJB217 (AJB137  $\Delta$ PP\_3270-PP\_3273) were grown in M9 medium containing 10 mM D-glucose and supplemented with 8 mM CP at 30 °C for 48 h. CP and glutaric acid concentrations were tracked for biological samples and an abiotic control. The data represent the mean from three biological replicates (triplicate abiotic controls) and error bars denote the standard error of the mean.

## Supplementary Table 1. Strains and Plasmids Used in This Study

**S. Table 3. Strains and Plasmids used in this study**

| Strains                      | Genotype                                                                                                                                                             | Description                                                                                                                                                                                                                                                                                                                                                                                                                                                                                                                                                                                                                                                                                                                                                                                                                                                                    |
|------------------------------|----------------------------------------------------------------------------------------------------------------------------------------------------------------------|--------------------------------------------------------------------------------------------------------------------------------------------------------------------------------------------------------------------------------------------------------------------------------------------------------------------------------------------------------------------------------------------------------------------------------------------------------------------------------------------------------------------------------------------------------------------------------------------------------------------------------------------------------------------------------------------------------------------------------------------------------------------------------------------------------------------------------------------------------------------------------|
| EM42                         | <i>Pseudomonas putida</i> KT2440<br><i>Δprophage1 Δprophage4</i><br><i>Δprophage3 Δprophage2 ΔTn7</i><br><i>ΔendA-1 ΔendA-2 ΔhsdRMS</i><br><i>Δflagellum ΔTn4652</i> | Construction of this strain is described in Martinez-Garcia E, Nikel PI, Aparicio T, de Lorenzo V. <i>Pseudomonas</i> 2.0: genetic upgrading of <i>P. putida</i> KT2440 as an enhanced host for heterologous gene expression. <i>Microb Cell Fact</i> 13, 159 (2014).                                                                                                                                                                                                                                                                                                                                                                                                                                                                                                                                                                                                          |
| RH300                        | EM42 PP_5042: <i>P<sub>tac</sub>:mekAB:cpnDE</i>                                                                                                                     | <i>Pseudomonas veronii</i> MK700 <i>mekAB</i> and <i>Comamonas</i> sp. NCIMB 9872 <i>cpnDE</i> were expressed in the <i>P. putida</i> chromosome using the <i>P<sub>tac</sub></i> promoter downstream of the PP_5042 locus in the EM42 strain background. This construct was made using pRH83 via a selection ( <i>nptII</i> , kanamycin)/counterselection ( <i>sacB</i> , sucrose) approach. Colony PCR using 2x MyTaq (Bioline) with oRH328/oRH329 was used to confirm correct insertion of the synthetic operon (9000 bp band). oRH328/oRH329, oRH293-oRH295, and oRH322-oRH327 were used for sequence verification by Sanger sequencing (Genewiz).                                                                                                                                                                                                                         |
| AJB87-AJB91                  | Parental- EM42<br>PP_5042: <i>P<sub>tac</sub>:mekAB:cpnDE</i>                                                                                                        | RH300 isolates following growth in M9 + 10 mM CP                                                                                                                                                                                                                                                                                                                                                                                                                                                                                                                                                                                                                                                                                                                                                                                                                               |
| AJB137                       | EM42 PP_5042: <i>P<sub>tac</sub>:mekAB:cpnDE</i><br><i>ΔgcdH:ΔgcoT ΔcsiD</i>                                                                                         | The native <i>csiD</i> gene was eliminated from the RH300 background using pAJB04 via a selection ( <i>nptII</i> , kanamycin)/counterselection ( <i>sacB</i> , sucrose) approach. Colony PCR using 2x MyTaq (Bioline) with oAJB071/oAJB072 was used to confirm correct deletion of the <i>csiD</i> gene (1125 bp band). Then the native <i>gcdH:gcoT</i> operon was eliminated from this background using pAJB010 via a selection ( <i>nptII</i> , kanamycin)/counterselection ( <i>sacB</i> , sucrose) approach. Colony PCR using 2x MyTaq (Bioline) with oAJB069/oAJB096 was used to confirm correct deletion of the <i>gcdH:gcoT</i> genes (544 bp band). The inability for the <i>ΔgcdH:gcoT ΔcsiD</i> double mutant to grow on glutaric acid as the sole carbon source was confirmed by screening for no growth on M9 + 30 mM glutaric acid plates.                       |
| AJB171-172, 175-176, 179-180 | Parental- EM42<br>PP_5042: <i>P<sub>tac</sub>:mekAB:cpnDE</i><br><i>ΔgcdH:ΔgcoT ΔcsiD</i>                                                                            | AJB137 TALE isolates tolerated to 2-cyclopenten-1-one via serial passages in M9 + 10 mM D-glucose, 2.5 mM 2CP up to M9 + 10 mM D-glucose, 5.5 mM 2CP (0.5 mM increased 2CP between passages for 7 passages)                                                                                                                                                                                                                                                                                                                                                                                                                                                                                                                                                                                                                                                                    |
| AJB185                       | EM42 PP_5042: <i>P<sub>tac</sub>:mekAB:cpnDE</i><br><i>ΔpaaYX</i>                                                                                                    | The native <i>paaYX</i> operon was eliminated from the RH300 background using pAJB26 via a selection ( <i>nptII</i> , kanamycin)/counterselection ( <i>sacB</i> , sucrose) approach. Colony PCR using 2x MyTaq (Bioline) with oAJB195/oAJB196 was used to confirm correct deletion of the <i>paaYX</i> operon (131 bp band).                                                                                                                                                                                                                                                                                                                                                                                                                                                                                                                                                   |
| AJB186                       | EM42 <i>ΔgcdH:gcoT ΔcsiD</i><br>PP_5042: <i>P<sub>tac</sub>:mekAB:cpnDE</i><br><i>ΔpaaYX</i>                                                                         | The native <i>paaYX</i> operon was eliminated from the AJB137 background using pAJB26 via a selection ( <i>nptII</i> , kanamycin)/counterselection ( <i>sacB</i> , sucrose) approach. Colony PCR using 2x MyTaq (Bioline) with oAJB195/oAJB196 was used to confirm correct deletion of the <i>paaYX</i> operon (131 bp band).                                                                                                                                                                                                                                                                                                                                                                                                                                                                                                                                                  |
| AJB195                       | EM42 <i>ΔgcdH:gcoT ΔcsiD</i><br>PP_5042: <i>P<sub>tac</sub>:mekAB:cpnDE</i><br><i>ΔnemA</i>                                                                          | The native <i>nemA</i> gene was eliminated from the AJB137 background using pAJB32 via a selection ( <i>nptII</i> , kanamycin)/counterselection ( <i>sacB</i> , sucrose) approach. Colony PCR using 2x MyTaq (Bioline) with oAJB226/oAJB227 was used to confirm correct deletion of the <i>nemA</i> gene (626 bp band).                                                                                                                                                                                                                                                                                                                                                                                                                                                                                                                                                        |
| AJB196                       | EM42 PP_5042: <i>P<sub>tac</sub>:mekAB:cpnDE</i><br><i>ΔpaaYX ΔpaaFGHIJKABCDE</i>                                                                                    | The native <i>paaFGHIJKABCDE</i> operon was eliminated from the AJB186 background using pAJB029 via a selection ( <i>nptII</i> , kanamycin)/counterselection ( <i>sacB</i> , sucrose) approach. Colony PCR using 2x MyTaq (Bioline) with oAJB211/oAJB212 was used to confirm correct deletion of the <i>paaFGHIJKABCDE</i> operon (284 bp band).                                                                                                                                                                                                                                                                                                                                                                                                                                                                                                                               |
| AJB197                       | EM42 PP_5042: <i>P<sub>tac</sub>:mekAB:cpnDE</i><br><i>ΔpaaYX ΔPP_3270:PP_3274</i>                                                                                   | The native PP_3270:PP_3274 operon was eliminated from the AJB186 background using pAJB030 via a selection ( <i>nptII</i> , kanamycin)/counterselection ( <i>sacB</i> , sucrose) approach. Colony PCR using 2x MyTaq (Bioline) with oAJB217/oAJB218 was used to confirm correct deletion of the PP_3270:PP_3274 operon (231 bp band).                                                                                                                                                                                                                                                                                                                                                                                                                                                                                                                                           |
| AJB217                       | EM42 PP_5042: <i>P<sub>tac</sub>:mekAB:cpnDE</i><br><i>ΔgcdH:gcoT ΔcsiD</i><br>ΔPP_3270:PP_3274                                                                      | The PP_3270:PP_3274 operon was eliminated from the AJB137 background using pAJB30 via a selection ( <i>nptII</i> , kanamycin)/counterselection ( <i>sacB</i> , sucrose) approach. Colony PCR using 2x MyTaq (Bioline) with oAJB217/oAJB218 was used to confirm correct deletion of the PP_3270:PP_3274 operon (231 bp band).                                                                                                                                                                                                                                                                                                                                                                                                                                                                                                                                                   |
| Plasmids                     | Genotype                                                                                                                                                             | Description                                                                                                                                                                                                                                                                                                                                                                                                                                                                                                                                                                                                                                                                                                                                                                                                                                                                    |
| pRH83                        | pK18sB-<br>PP_5042: <i>P<sub>tac</sub>:mekAB:cpnDE</i>                                                                                                               | For chromosomal heterologous expression of <i>Pseudomonas veronii</i> MK700 <i>mekAB</i> and <i>Comamonas</i> sp. NCIMB 9872 <i>cpnDE</i> in <i>P. putida</i> KT2440. Used Q5 Hot Start High-Fidelity 2X Master mix to amplify <i>mekAB</i> and the pK18sB backbone (8,081 bp) encoded as pAM032 (W.R. Henson, 2021, <i>Metabolic Engineering</i> ) with oRH318/oRH319 and also amplify <i>cpnDE</i> from a <i>cpnABCDE</i> gene fragment synthesized by TWIST Biosciences (San Francisco) using oRH320/oRH321. Fragments were gel purified using the Zymoclean Gel DNA Recovery kit. HiFi assembly using the two fragments with 100 ng vector and a 3:1 molar ratio of the <i>cpnDE</i> fragment yielded a 10,720 bp plasmid that was confirmed by PCR amplification with oRH232/oRH233 and Sanger sequencing using oRH232/oRH233, oRH293-oRH295 and oRH322-oRH327 (Genewiz). |
| pAJB04                       | pK18sB- <i>ΔcsiD</i>                                                                                                                                                 | For deletion of <i>P. putida</i> KT2440 <i>csiD</i> (PP_2909). Used Q5 Hot Start High-Fidelity 2X Master mix to amplify 1000 bp upstream of PP_2909 (including the first 10 amino acids from <i>csiD</i> ) with oAJB033/oAJB034 and 1000 bp downstream (including the <i>csiD</i> stop codon) with oAJB035/oAJB036. Fragments were gel purified using the Zymoclean Gel DNA Recovery kit. 2 μg pK18sB vector was digested using EcoRI and HindIII and a 2,993 bp band was gel purified. HiFi assembly using the three fragments with 100 ng vector and a 3:1 molar ratio of each fragment yielded a 4,993 bp plasmid that was confirmed by restriction digest and oCJ680/oCJ681 were used for PCR amplification and Sanger sequencing (Genewiz).                                                                                                                               |
| pAJB10                       | pK18sB- <i>ΔgcdH:gcoT</i>                                                                                                                                            | For deletion of <i>P. putida</i> KT2440 <i>gcdH:gcoT</i> . Used Q5 Hot Start High-Fidelity 2X Master mix to amplify 587 bp upstream of the <i>gcdH</i> start codon with oAJB137/oAJB093 and 560 bp downstream after the <i>gcoT</i> stop codon with oAJB094/oAJB138. Fragments were gel purified using the Zymoclean Gel DNA Recovery kit. 2 μg pK18sB was digested using EcoRI and HindIII and a 2,993 bp band was gel purified. HiFi assembly using the three fragments with 100 ng vector and a 3:1 molar ratio of each fragment yielded a 4,140 bp plasmid that was confirmed by restriction digest and oCJ680/oCJ681 were used for PCR amplification and Sanger sequencing (Genewiz).                                                                                                                                                                                     |
| pAJB26                       | pK18sB- <i>ΔpaaYX</i>                                                                                                                                                | For deletion of <i>P. putida</i> KT2440 <i>paaYX</i> (PP_3285-PP_3286). Used Q5 Hot Start High-Fidelity 2X Master mix to amplify 800 bp upstream of the <i>paaY</i> start codon with oAJB191/oAJB192 and 800 bp downstream starting after the <i>paaX</i> stop codon with oAJB193/oAJB194. Fragments were gel purified using the Zymoclean Gel DNA Recovery kit. 2 μg pK18sB vector was digested using EcoRI and HindIII and a 2,993 bp band was gel purified. HiFi assembly using the three fragments with 100 ng vector and a 3:1 molar ratio of each fragment yielded a 4,593 bp plasmid that was confirmed by PCR amplification with oCJ680/oCJ681 and these primers were also used for sequence confirmation using Sanger sequencing (Genewiz).                                                                                                                           |
| pAJB29                       | pK18sB- <i>ΔpaaFGHIJKABCDE</i>                                                                                                                                       | For deletion of the <i>P. putida</i> KT2440 <i>paaFGHIJKABCDE</i> operon (PP_3284-PP_3274). Used Q5 Hot Start High-Fidelity 2X Master mix to amplify 800 bp upstream of <i>paaF</i> (including the first 10 amino acids from <i>paaF</i> ) with oAJB207/oAJB208 and 800 bp downstream (including the <i>paaE</i> stop codon) with oAJB209/oAJB210. Fragments were gel purified using the Zymoclean Gel DNA Recovery kit. 2 μg pK18sB vector was digested using EcoRI and HindIII and a 2,993 bp band was gel purified. HiFi assembly using the three fragments with 100 ng vector and a 3:1 molar ratio of each fragment yielded a 4,993 bp plasmid that was confirmed by restriction digest and oCJ680/oCJ681 were used for PCR amplification and Sanger sequencing (Genewiz).                                                                                                |
| pAJB30                       | pK18sB-ΔPP_3270:PP_3273                                                                                                                                              | For deletion of the <i>P. putida</i> KT2440 PP_3273-PP_3270 operon (PP_3270 also called <i>paaZ</i> , PP_3271 also called <i>phaK</i> , PP_3272 also called <i>actP-III</i> ). Used Q5 Hot Start High-Fidelity 2X Master mix to amplify 800 bp upstream of PP_3273 (including the first 10 amino acids from PP_3273) with oAJB213/oAJB214 and 800 bp downstream (including the <i>paaZ</i> stop codon) with oAJB215/oAJB216. Fragments were gel purified using the Zymoclean Gel DNA Recovery kit. 2 μg pK18sB vector was digested using EcoRI and HindIII and a 2,993 bp band was gel purified. HiFi assembly using the three fragments with 100 ng vector and a 3:1 molar ratio of each fragment yielded a 4,993 bp plasmid that was confirmed by restriction digest and oCJ680/oCJ681 were used for PCR amplification and Sanger sequencing (Genewiz).                      |
| pAJB31                       | pK18sB- <i>ΔmekB:cpnDE</i>                                                                                                                                           | For deletion of <i>mekB</i> and <i>cpnDE</i> from <i>P. O</i> RH300. Used Q5 Hot Start High-Fidelity 2X Master mix to amplify 800 bp upstream of the <i>mekB</i> start codon with oAJB219/oAJB220 and 800 bp downstream starting after the <i>cpnE</i> stop codon with oAJB221/oAJB204. Fragments were gel purified using the Zymoclean Gel DNA Recovery kit. 2 μg pK18sB vector was digested using EcoRI and HindIII and a 2,993 bp band was gel purified. HiFi assembly using the three fragments with 100 ng vector and a 3:1 molar ratio of each fragment yielded a 4,593 bp plasmid that was confirmed by PCR amplification with oCJ680/oCJ681 and these primers were also used for sequence confirmation using Sanger sequencing (Genewiz).                                                                                                                              |
| pAJB32                       | pK18sB- <i>ΔnemA</i>                                                                                                                                                 | For deletion of <i>nemA</i> from <i>P. putida</i> KT2440. Used Q5 Hot Start High-Fidelity 2X Master mix to amplify 800 bp upstream of the <i>nemA</i> start codon with oAJB222/oAJB223 and 800 bp downstream starting after the <i>cpnE</i> stop codon with oAJB224/oAJB225. Fragments were gel purified using the Zymoclean Gel DNA Recovery kit. 2 μg pK18sB vector was digested using EcoRI and HindIII and a 2,993 bp band was gel purified. HiFi assembly using the three fragments with 100 ng vector and a 3:1 molar ratio of each fragment yielded a 4,593 bp plasmid that was confirmed by PCR amplification with oCJ680/oCJ681 and these primers were also used for sequence confirmation using Sanger sequencing (Genewiz).                                                                                                                                         |

**Supplementary Table 2. Oligonucleotides Used in This Study**

| Primer ID | Sequence                                            | Primer ID | Sequence                                                  |
|-----------|-----------------------------------------------------|-----------|-----------------------------------------------------------|
| oAJB033   | ACAGCTATGACATGATTACGAATTCGGCATGCTGGTTCCTGG          | oAJB215   | TTCTACACATCAGGCGATGCTTTCTATGCGTTCG                        |
| oAJB034   | CCTGTCAATAAAGTTCGTCGATCTGCGTAAAGG                   | oAJB216   | CGTTGTAAAACGACGGCCAGTCCAGCTCCAGTTCGGGGG                   |
| oAJB035   | CGACGAACCTTAATGACAGGGCGCGGG                         | oAJB217   | AAGTGCCTTGAGCACC                                          |
| oAJB036   | TAAAACGACGGCCAGTGCCCAAGCTTGCCTGGTCAGGGTCGTG         | oAJB218   | CTTACCTGCGAAGAGG                                          |
| oAJB069   | TGCTGGCGCATACCACGAAA                                | oAJB219   | ACAGCTATGACATGATTACGAATTCGGAAGGACGGTAGCCTGG               |
| oAJB071   | GGCAGTATGGAACGCCTTGTC                               | oAJB220   | AGTGTTCATGCCTCAGGCCATTTCGAAGCCC                           |
| oAJB072   | CCAGTAGCGTTCAGGCCATTG                               | oAJB221   | GAATGGCCTGAGGCATGAAGCACTGAACCCAC                          |
| oAJB093   | GCCTGACGGCCTCCCCGCTTTTCATGAGCGAATCTCGAAATAGGGG      | oAJB222   | ACAGCTATGACATGATTACGAATTCGGGGATGGTATTCACCGGC              |
| oAJB094   | ATGAAAAGCGGGGAGGC                                   | oAJB223   | CTCTGGAGCTGCATGCAAAAACGGGCGCTCTTG                         |
| oAJB096   | AAGTGGGGCGCATTATAAGGGG                              | oAJB224   | CCCGTTTTTGCATGCAGCTCCAGAGGTGAAAAAC                        |
| oAJB137   | ACAGCTATGACATGATTACGAATTCATCGAAGGTAGTGTCCG          | oAJB225   | TAAAACGACGGCCAGTGCCAAAGCTTGATGCCACGCTGACCC                |
| oAJB138   | TAAAACGACGGCCAGTGCCAAAGCTTCAGTTCAATACTGCTGGGT       | oAJB226   | GTAGCACAAATGCAACACT                                       |
| oAJB191   | ACAGCTATGACATGATTACGAATTCACCGACGGCACGTAACAG         | oAJB227   | GAATAACCAATGGGTGAGTTCC                                    |
| oAJB192   | GCGAGCACTCCCGGCAACACTCTCGAAATGATTTGG                | oCJ680    | TTTGTGATGCTCGTCAGGG                                       |
| oAJB193   | GAGAGTGTGCGGGGAGTGCCTCGCCTC                         | oCJ681    | CTTCCCAACCTTACCAGAG                                       |
| oAJB194   | TAAAACGACGGCCAGTGCCAAAGCTTAAACCCTATTCACCTGAAACCGCTG | oRH293    | CTCGGTGTGCGGTTTCACGTG                                     |
| oAJB195   | CAACACAAGTGATACACGAT                                | oRH294    | TCTGTGCGGGCTATTCGTC                                       |
| oAJB196   | TCGACGCCGTGAATGTT                                   | oRH295    | CGGACAATTCGATGCGCATAATCG                                  |
| oAJB201   | AGGAAACAGCTATGACATGATTACGAATTCACCAACAGATCGGCAACGG   | oRH318    | AGTCAAAAAGCCTCCGACCGG                                     |
| oAJB202   | AGTGTTCATGCCTCAGTATGCGGGGCTCGA                      | oRH319    | TCAGTATGCCGGGCTCGAG                                       |
| oAJB203   | CCGGCATACTGAGGCATGAAGCACTGAACCCAC                   | oRH320    | GCCGAGCTCCTCTCGAGCCCGGCATACTGAACAACAATAGGACAGACCAAGACTAGG |
| oAJB204   | TAAAACGACGGCCAGTGCCAAAGCTTGCTGACGGCCATGGC           | oRH321    | ATGGGAGCGGTGGGTTCAGTGTTCATGCCTCAACCTGCGCTCGTGTAGG         |
| oAJB205   | CCATCGAAGTACTGCATCAT                                | oRH322    | TTCATGCCCACTCTGCGATTCCGG                                  |
| oAJB206   | TACGCCCTCGAGCAGTTCA                                 | oRH323    | TGCGTGAAATGGGTCTGACCG                                     |
| oAJB207   | ACAGCTATGACATGATTACGAATTCGCGCACTGGGTTTGC            | oRH324    | GTCCCGGAGATGTTCTTCGATGAAC                                 |
| oAJB208   | TGTGCAGGGCCCTAGACCGAGTGGCTGCTTC                     | oRH325    | GAAAAGGCCAAGAAGGTCATAATGAACTCC                            |
| oAJB209   | CGACTCGGTCTAGGGCGCCTGCACATCGATATAT                  | oRH326    | CTGCTGACCATGGCCTGGAAGTG                                   |
| oAJB210   | TAAAACGACGGCCAGTGCCAAAGCTTGTGTTGACCTGGGCTGGCGA      | oRH327    | CGGTGGTGACCACCCCTAC                                       |
| oAJB211   | CGCATAGAGCATATACTG                                  | oRH328    | AAATCCAGCCAGTTCCTCGG                                      |
| oAJB212   | GCGATCTCTGGTTTTGT                                   | oRH329    | AACTGTTCTGTCAGACGT                                        |
| oAJB213   | AGGAAACAGCTATGACATGATTACGTCCATGGAGAAGAGGAGGC        | oRH332    | GCAAAACGAGTTAAGGCTGTCGCGGCTGA TCCGCGTAAAAATACCAGGTCAACAC  |
| oAJB214   | AGAAAGCATCGCTGATGTGTAGAAGCCACTGGC                   | oRH333    | ATGCCTGCAGGTGACTCTAGAGGATCCCC GTTTCGCCGCTCTCGTTGG         |



**Supplementary Table 4. Mutations in RH300 vs. the Predicted RH300 Sequence (from NC\_002947)**

| Genome Position    | Nucleotide Change                                                                                                                                     | Locus Effected | CDS Position | Protein Effect | Polymorphism Type                              | Amino Acid Change | Codon Change                                 | Read Coverage     | Variant Frequency          | Notes                                                                                                                                                                                                       |
|--------------------|-------------------------------------------------------------------------------------------------------------------------------------------------------|----------------|--------------|----------------|------------------------------------------------|-------------------|----------------------------------------------|-------------------|----------------------------|-------------------------------------------------------------------------------------------------------------------------------------------------------------------------------------------------------------|
| 172966             | A -> G                                                                                                                                                | Intergenic     | -            | -              | SNP (transition)                               | -                 | -                                            | 587               | 97.80%                     | Upstream of 23S ribosomal RNA (PP_RS00830)                                                                                                                                                                  |
| 178396             | A -> G                                                                                                                                                | Intergenic     | -            | -              | SNP (transition)                               | -                 | -                                            | 485               | 98.40%                     | Upstream of 23S ribosomal RNA (PP_RS00845)                                                                                                                                                                  |
| 278745             | (+) A                                                                                                                                                 | Intergenic     | -            | -              | Insertion                                      | -                 | -                                            | 269               | 95.90%                     | Upstream of SfnB family sulfur acquisition oxidoreductase (PP_RS01190)                                                                                                                                      |
| 307867             | (+) C                                                                                                                                                 | PP_RS01335     | 738          | Frameshift     | Insertion                                      | -                 | -                                            | 776               | 99.60%                     | PP_RS01335 annotated as a pseudogene (phosphoenolpyruvate carboxykinase fragment)                                                                                                                           |
| 336126             | (+) T                                                                                                                                                 | PP_RS01475     | 211          | Frameshift     | Insertion                                      | -                 | -                                            | 559               | 99.80%                     | PP_RS01475 annotated as a DUF3077 domain-containing protein                                                                                                                                                 |
| 353067             | A -> G                                                                                                                                                | Intergenic     | -            | -              | SNP (transition)                               | -                 | -                                            | 283               | 98.20%                     | Between the convergently encoded genes <i>hisF</i> and <i>choV</i>                                                                                                                                          |
| 499203             | A -> G                                                                                                                                                | Intergenic     | -            | -              | SNP (transition)                               | -                 | -                                            | 389               | 99.70%                     | Upstream of an ABC transporter ATP-binding protein (PP_RS02170)                                                                                                                                             |
| 1070248            | (+) GA                                                                                                                                                | Intergenic     | -            | -              | Insertion                                      | -                 | -                                            | 532 -> 542        | 95.1% -> 95.2%             | Between the convergently encoded genes PP_RS0487 and PP_RS04880                                                                                                                                             |
| 1126648            | (+) C                                                                                                                                                 | Intergenic     | -            | -              | Insertion                                      | -                 | -                                            | 310               | 98.40%                     | Upstream of L-serine ammonia-lyase (PP_RS05165)                                                                                                                                                             |
| 1419550            | (+) C                                                                                                                                                 | Intergenic     | -            | -              | Insertion                                      | -                 | -                                            | 588               | 98.10%                     | Upstream of a DUF3077 domain-containing protein (PP_RS06445)                                                                                                                                                |
| 1499480 -> 1499481 | CA -> AC                                                                                                                                              | Intergenic     | -            | -              | 2 SNPs (transversions)                         | -                 | -                                            | 215 -> 214        | 78.60% -> 94.40%           | Upstream of cell division protein ZapE (PP_RS06790)                                                                                                                                                         |
| 1499498 -> 1499499 | T -> CG                                                                                                                                               | Intergenic     | -            | -              | SNP (transition) and Insertion                 | -                 | -                                            | 226 -> 219        | 83.60% -> 93.20%           | Upstream of cell division protein ZapE (PP_RS06790)                                                                                                                                                         |
| 1499509            | (+) C                                                                                                                                                 | Intergenic     | -            | -              | Insertion                                      | -                 | -                                            | 223               | 94.20%                     | Upstream of cell division protein ZapE (PP_RS06790)                                                                                                                                                         |
| 1892582            | (+) C                                                                                                                                                 | Intergenic     | -            | -              | Insertion                                      | -                 | -                                            | 459               | 99.80%                     | Upstream of RluA family pseudouridine synthase (PP_RS08900)                                                                                                                                                 |
| 2490804 -> 2490827 | (-) GATCAACGGCAACGGC AACGGCAA                                                                                                                         | PP_RS28385     | 102          | Deletion       | Deletion                                       | KINGNGNGN -> N    | AAG.ATC,AAC.GGC, AAC.GGC,AAC.GGC, AAC -> AAC | 419               | 99.80%                     | PP_RS28385 annotated as a hypothetical protein                                                                                                                                                              |
| 2546570            | (-) T                                                                                                                                                 | Intergenic     | -            | -              | Deletion                                       | -                 | -                                            | 602               | 100.00%                    | Upstream of tRNA-His (PP_RS12000)                                                                                                                                                                           |
| 3713411            | (+) G                                                                                                                                                 | Intergenic     | -            | -              | Insertion                                      | -                 | -                                            | 315               | 98.70%                     | Upstream of hydroxymethylglutaryl-CoA lyase (PP_RS17675)                                                                                                                                                    |
| 3818865 -> 3818867 | TTA -> CTT                                                                                                                                            | PP_RS18130     | 67 -> 65     | Substitution   | SNP (transition) -> SNP (transversion)         | IR -> KG          | ATA. AGA -> AAA, GGA                         | 220 -> 220        | 94.10% -> 83.20%           | PP_RS18130 annotated as an ABC transporter substrate-binding protein                                                                                                                                        |
| 4398970 -> 4398971 | CT -> TC                                                                                                                                              | Intergenic     | -            | -              | 2 SNPs (transitions)                           | -                 | -                                            | 356 -> 357        | 96.90% -> 86.00%           | Between the convergently encoded genes PP_RS28355 and PP_RS21100                                                                                                                                            |
| 4398976            | (+) G                                                                                                                                                 | Intergenic     | -            | -              | Insertion                                      | -                 | -                                            | 362               | 99.40%                     | Between the convergently encoded genes PP_RS28355 and PP_RS21100                                                                                                                                            |
| 4398998            | (+) C                                                                                                                                                 | Intergenic     | -            | -              | Insertion                                      | -                 | -                                            | 364               | 94.50%                     | Between the convergently encoded genes PP_RS28355 and PP_RS21100                                                                                                                                            |
| 4549137            | A -> T                                                                                                                                                | PP_RS21755     | 389          | Substitution   | SNP (transversion)                             | L -> Q            | CTG -> CAG                                   | 738               | 89.00%                     | PP_RS21755 annotated as a succinate dehydrogenase iron-sulfur subunit                                                                                                                                       |
| 4553751 -> 4553760 | TATTTTCTG -> ATTTGTCT                                                                                                                                 | Intergenic     | -            | -              | Deletion -> SNP (transversion) -> Substitution | -                 | -                                            | 332 -> 295 -> 269 | 100.00% -> 98.30% -> 89.0% | Between the convergently encoded genes <i>glrA</i> and PP_RS21780                                                                                                                                           |
| 4554169 -> 4554238 | AACCTCCGCCAACTGCA ATTCGTGAACCAAGCA AAAGGCCCGGAAAAGG CCCTCCGACGCCCCCC AACCC -> CAGCTCTGCGACTTGC ATTCGTGAATCCAGGCA CAGGCCCGGACACGT CCTCTGCAGGCCTCG ACCT | PP_RS21780     | 254 -> 185   | Disruption     | Multiple Mutations                             | -                 | -                                            | > 793             | > 99.40%                   | PP_RS21780 is annotated as a START domain-containing pseudogene                                                                                                                                             |
| 4621120 -> 4621128 | (-) AAGCGCCGC                                                                                                                                         | Intergenic     | -            | -              | Deletion                                       | -                 | -                                            | 307               | 80.10%                     | Between the divergently encoded genes PP_RS21985 and <i>dsbD</i><br>*Note, this mutation is not present in strains made from this background. Likely unique to the isolate sequenced and not the background |
| 5293712            | (+) GCC                                                                                                                                               | Intergenic     | -            | -              | Insertion                                      | -                 | -                                            | 405 -> 421        | 90.1% -> 90.4%             | Upstream of a DUF2867 domain-containing protein (PP_RS25515)                                                                                                                                                |
| 5412855 -> 5412856 | CG -> GCC                                                                                                                                             | Intergenic     | -            | -              | Insertion -> SNP (transversion)                | -                 | -                                            | 507 -> 504        | 99.80% -> 99.60%           | Between the convergently encoded genes PP_RS25985 and PP_RS25990                                                                                                                                            |
| 5419519            | (+) CGGG                                                                                                                                              | Intergenic     | -            | -              | Insertion                                      | -                 | -                                            | > 291             | 80.70% -> 89.7%            | Upstream of a hemolysin III family protein (PP_RS26015)                                                                                                                                                     |
| 5757466            | T -> C                                                                                                                                                | Intergenic     | -            | -              | SNP (transition)                               | -                 | -                                            | 256               | 99.20%                     | Between the convergently encoded genes PP_RS27440 and PP_RS27445                                                                                                                                            |



**Supplementary Table 5. Mutations in AJB137 Background vs. the RH300 Background.**

| Change             | CDS Nucleotide Position                                 | Protein Effect                                                 | Genes Effected                                                   | Polymorphism Type     | Amino Acid Change | Codon Change | Coverage | Variant Frequency |
|--------------------|---------------------------------------------------------|----------------------------------------------------------------|------------------------------------------------------------------|-----------------------|-------------------|--------------|----------|-------------------|
| Deletion           | <i>gcdH</i> <sub>1</sub> -> <i>gcoT</i> <sub>1135</sub> | PP_RS00815 ( <i>gcdH</i> )-PP_RS00820 ( <i>gcoT</i> ) Deletion | PP_RS00815 ( <i>gcdH</i> ) and PP_RS00820 ( <i>gcoT</i> )        | -                     | -                 | -            | -        | -                 |
| SNP (transition)   | -                                                       | -                                                              | Reversion of the Intergenic mutation at position 178396 in RH300 | G -> A (Transition)   | -                 | -            | 8        | 100%              |
| SNP (transition)   | 328 bp upstream PP_RS10035                              | -                                                              | Intergenic mutation upstream of PP_RS10035                       | C -> T (Transition)   | -                 | -            | 65       | 100%              |
| Deletion           | <i>csiD</i> <sub>30</sub> -> <i>csiD</i> <sub>978</sub> | PP_RS15090 ( <i>csiD</i> ) Deletion                            | PP_RS15090 ( <i>csiD</i> )                                       | -                     | -                 | -            | -        | -                 |
| SNP (transition)   | PP_RS18045 <sub>610</sub>                               | A -> T Substitution                                            | PP_RS18045                                                       | G -> A (Transition)   | A -> T            | GCT -> ACT   | 62       | 100%              |
| SNP (transversion) | PP_RS21755 <sub>389</sub>                               | Substitution                                                   | Reversion of the mutation at position 4549137 in RH300           | T -> A (Transversion) | Q -> L            | CAG -> CTG   | 50       | 100%              |
| SNP (transition)   | 39 bp upstream PP_RS28365                               | -                                                              | Intergenic mutation upstream of PP_RS28365                       | G -> A (Transition)   | -                 | -            | 41       | 95%               |

**Supplementary Table 6. Percent Bio-oil Input Analysis.**

| <b>Distillation_1</b> |                   |                       |
|-----------------------|-------------------|-----------------------|
| <b>fraction</b>       | <b>weight (g)</b> | <b>weight_percent</b> |
| Initial               | 1684.04           | 1.000                 |
| 1                     | 86.72             | 0.051                 |
| 2                     | 15.89             | 0.009                 |
| 3                     | 103.93            | 0.062                 |
| 4                     | 247.76            | 0.147                 |
| 5                     | 98.81             | 0.059                 |
| Boiler Final          | 1077.25           | 0.640                 |
| Losses                | 53.68             | 0.032                 |

  

| <b>Distillation_2</b> |                   |                       |
|-----------------------|-------------------|-----------------------|
| <b>fraction</b>       | <b>weight (g)</b> | <b>weight_percent</b> |
| Initial               | 86.97             | 1.000                 |
| 1                     | 9.45              | 0.109                 |
| 2                     | 9.9               | 0.114                 |
| 3                     | 36.88             | 0.424                 |
| 4                     | 14.47             | 0.166                 |
| Boiler Final          | 13.04             | 0.150                 |
| Losses                | 3.23              | 0.037                 |

  

| <b>Distillation_3</b> |                   |                       |
|-----------------------|-------------------|-----------------------|
| <b>fraction</b>       | <b>weight (g)</b> | <b>weight_percent</b> |
| Initial               | 35.65             | 1.000                 |
| 1                     | 3.93              | 0.110                 |
| 2                     | 3.48              | 0.098                 |
| 3                     | 6.79              | 0.190                 |
| 4                     | 8.14              | 0.228                 |
| 5                     | 7.61              | 0.213                 |
| Boiler Final          | 4.58              | 0.128                 |
| Losses                | 1.12              | 0.031                 |
